## Review Article

# Structure and function of microbial $\alpha$ -L-fucosidases: a mini review

Haiyang Wu<sup>1</sup>, C. David Owen<sup>2,3</sup> and  Nathalie Juge<sup>4</sup>

<sup>1</sup>Guangdong Provincial Engineering Laboratory of Biomass High Value Utilization, Institute of Biological and Medical Engineering, Guangdong Academy of Sciences, Guangzhou, China; <sup>2</sup>Diamond Light Source Ltd., Diamond House, Harwell Science and Innovation Campus, Didcot OX11 0DE, U.K.; <sup>3</sup>Research Complex at Harwell, Diamond House, Harwell Science and Innovation Campus, Didcot OX11 0FA, U.K.; <sup>4</sup>The Gut Microbes and Health Institute Strategic Programme, Quadram Institute Bioscience, Norwich Research Park, Norwich NR4 7UQ, U.K.

**Correspondence:** Nathalie Juge (nathalie.juge@quadram.ac.uk)

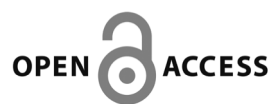

Fucose is a monosaccharide commonly found in mammalian, insect, microbial and plant glycans. The removal of terminal  $\alpha$ -L-fucosyl residues from oligosaccharides and glycoconjugates is catalysed by  $\alpha$ -L-fucosidases. To date, glycoside hydrolases (GHs) with exo-fucosidase activity on  $\alpha$ -L-fucosylated substrates (EC 3.2.1.51, EC 3.2.1.-) have been reported in the GH29, GH95, GH139, GH141 and GH151 families of the Carbohydrate Active Enzymes (CAZy) database. Microbes generally encode several fucosidases in their genomes, often from more than one GH family, reflecting the high diversity of naturally occurring fucosylated structures they encounter. Functionally characterised microbial  $\alpha$ -L-fucosidases have been shown to act on a range of substrates with  $\alpha$ -1,2,  $\alpha$ -1,3,  $\alpha$ -1,4 or  $\alpha$ -1,6 fucosylated linkages depending on the GH family and microorganism. Fucosidases show a modular organisation with catalytic domains of GH29 and GH151 displaying a  $(\beta/\alpha)_8$ -barrel fold while GH95 and GH141 show a  $(\alpha/\alpha)_6$  barrel and parallel  $\beta$ -helix fold, respectively. A number of crystal structures have been solved in complex with ligands, providing structural basis for their substrate specificity. Fucosidases can also be used in transglycosylation reactions to synthesise oligosaccharides. This mini review provides an overview of the enzymatic and structural properties of microbial  $\alpha$ -L-fucosidases and some insights into their biological function and biotechnological applications.

## Introduction

Fucose (Fuc) is a 6-deoxy sugar that can be present as D or L enantiomer in nature. D-fucose (6-deoxy-D-galactose) is frequently found in plant glycosides such as convolvulin from Convolvulaceae plants and in antimicrobials including curamycin produced by *Streptomyces curacoi* [1]. L-fucose (6-deoxy-L-galactose) is ubiquitously found in mammals, plants, insects and microbes as part of oligosaccharides, glycoproteins such as mucins, or lipid forming glycoconjugates via  $\alpha$  linkage [1], whilst  $\beta$ -L-fucose is rare and only seldomly reported in bacteria [2]. These structures are involved in a myriad of physiological processes, including immune recognition [3], development and neural functions [4,5] plant immunity [6,7] or host-microbe interactions (for a review see [8]). For example, Fuc has been implicated in bacteria colonisation by modulating chemotaxis [9], swimming motility [10], pathogenesis [11] or by acting as nutrient source for commensal or pathogenic bacteria [12–14]. In nature, Fuc can be linked to other sugar residues via various linkages in the non-reducing end through the action of fucosyltransferases [15,16]. Core Fuc, Le-type Fuc and O-Fuc have different biological functions and are associated with different diseases [17]. Terminal Fuc can be  $\alpha$ -1,2 linked to  $\beta$ -Galactose (Gal) from lactose (Lac) or N-acetyllactosamine (LacNAc) in human milk oligosaccharides (HMOs) [18] and blood group antigens [14]. Terminal Fuc can also be  $\alpha$ -1,3-linked to  $\beta$ -Glucose (Glc) and  $\beta$ -N-acetylglucosamine (GlcNAc) from HMOs [18], to  $\beta$ -GlcNAc from Lewis antigens [14] and  $\beta$ -Gal from HMOs [19] and

Received: 17 October 2022  
Revised: 09 January 2023  
Accepted: 16 January 2023

Version of Record published:  
18 April 2023

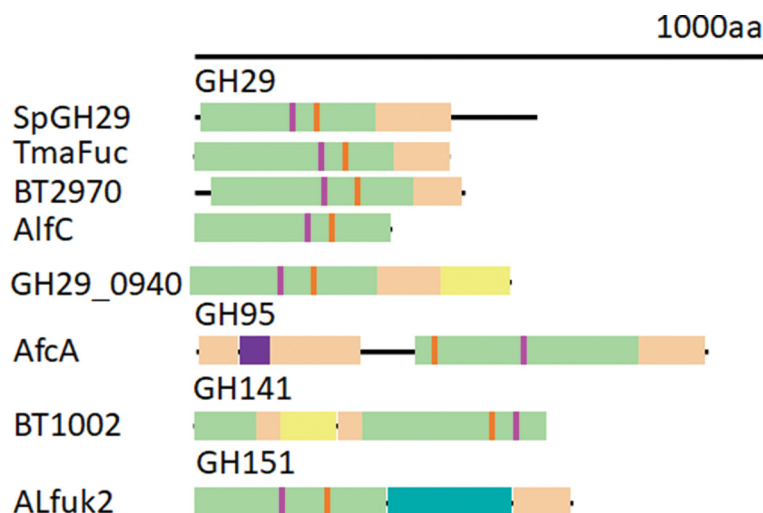

**Figure 1. Schematic modular representation of microbial  $\alpha$ -L-fucosidases from different GH families**

Catalytic modules are shown in green and  $\beta$ -sandwich domains that may have carbohydrate binding properties in light brown. If a second  $\beta$ -sandwich domain is present, such as in GH29\_0940, it is coloured yellow. AfcA has an additional helical barrel domain, coloured purple. For clarity, the AfcA N-terminal domain of unknown function and the C-terminal bacterial Ig-like domain are not shown. These extend the total length of AfcA to 1959 amino acids. ALfuk2 also has a Rossman fold domain, colored teal.

to  $\beta$ -GlcNAc in animal antennary N-glycans [20]. Terminal Fuc can also be found  $\alpha$ -1,4 linked to  $\beta$ -GlcNAc from HMOs and Lewis antigens, and in plant antennary N-glycans [16]. Core Fuc is present in plants [16] and invertebrate N-glycans [21,22] where it is  $\alpha$ -1,3-linked to the innermost GlcNAc. Core  $\alpha$ -1,3/ $\alpha$ -1,6-difucosylation is found in N-glycans from *Schistosoma mansoni*, *Caenorhabditis elegans*, insects and plants [16]. Human N-glycan core fucosylation is exclusively via  $\alpha$ -1,6 linkage [23,24].

Reflecting the high diversity of naturally-occurring fucosylated structures, microbes produce a range of  $\alpha$ -L-fucosidases (EC 3.2.1.51) of diverse substrate specificity cleaving the nonreducing terminal  $\alpha$ -L-fucose from these glycoconjugates. According to the Carbohydrate Active Enzymes database (CAZy database, www.cazy.org),  $\alpha$ -L-fucosidases are found into sequence-based families GH29, GH95, GH139, GH141, and GH151, a majority of which are from microbial sources, while GH1 [25] and GH30 [26] families contain  $\beta$ -D-fucosidases. This mini-review focuses on the structure and function of  $\alpha$ -L-fucosidases from microorganisms.

The most studied  $\alpha$ -L-fucosidases belong to the GH29 (covering EC 3.2.1.51, EC 3.2.1.111, EC 3.2.1.63, EC 3.2.1.127) and GH95 (covering EC 3.2.1.51, EC 3.2.1.63) families employing retaining and inverting catalytic mechanisms, respectively. The GH141 (covering EC 3.2.1.51, EC 3.2.1.8) and GH151 (EC 3.2.1.51) fucosidases belong to relatively new founded families and their catalytic mechanisms remain to be demonstrated experimentally although the latter is probably a retaining enzyme based on reported transglycosylation activity and crystal structures (see below). Generally, fucosidases found in these four GH families are multimodular proteins including a catalytic domain and one or more terminal  $\beta$ -sandwich domains that may have carbohydrate binding properties (Figure 1). GH29 enzymes usually contain a N-terminal catalytic domain and one [27–34] or two [35–38] C-terminal  $\beta$ -sandwich domains apart for AlfC from *Lactobacillus casei* which lacks a C-terminal domain [23]. Some of these ancillary domains have been annotated as CBM32 [36] or CBM35 [32] or other types [37] although their role in carbohydrate binding remains to be experimentally validated. The modularity of GH95 enzymes is featured by a catalytic domain flanked by two  $\beta$ -sandwich domains [39–41] (Figure 1). There is only one example of functionally characterised GH141 fucosidase covering a N-terminal  $\beta$ -sandwich domain and a C-terminal catalytic domain [42]. More recently, the first crystal structure of a GH151 fucosidase was determined, showing a N-terminal catalytic domain, a central  $\beta$ -barrel domain and a C-terminal  $\beta$ -sandwich fold [43]. The catalytic domains of GH29 and GH151 fucosidases adopt a TIM-barrel fold ( $\beta/\alpha$ )<sub>8</sub>, while GH95 and GH141 catalytic domains display a ( $\alpha/\alpha$ )<sub>6</sub> barrel and parallel  $\beta$ -helix fold, respectively (www.cazy.org) (see Figure 2). GH139 (EC 3.2.1.-) fucosidases are poorly characterised and their catalytic mechanisms and 3D structures are still unknown.

According to the CAZy database (updated on 15 November 2022), there are a total of 9867 annotated GH29 sequences, 96% of which are of bacteria origin, including from the Terrabacteria group (42%), FCB

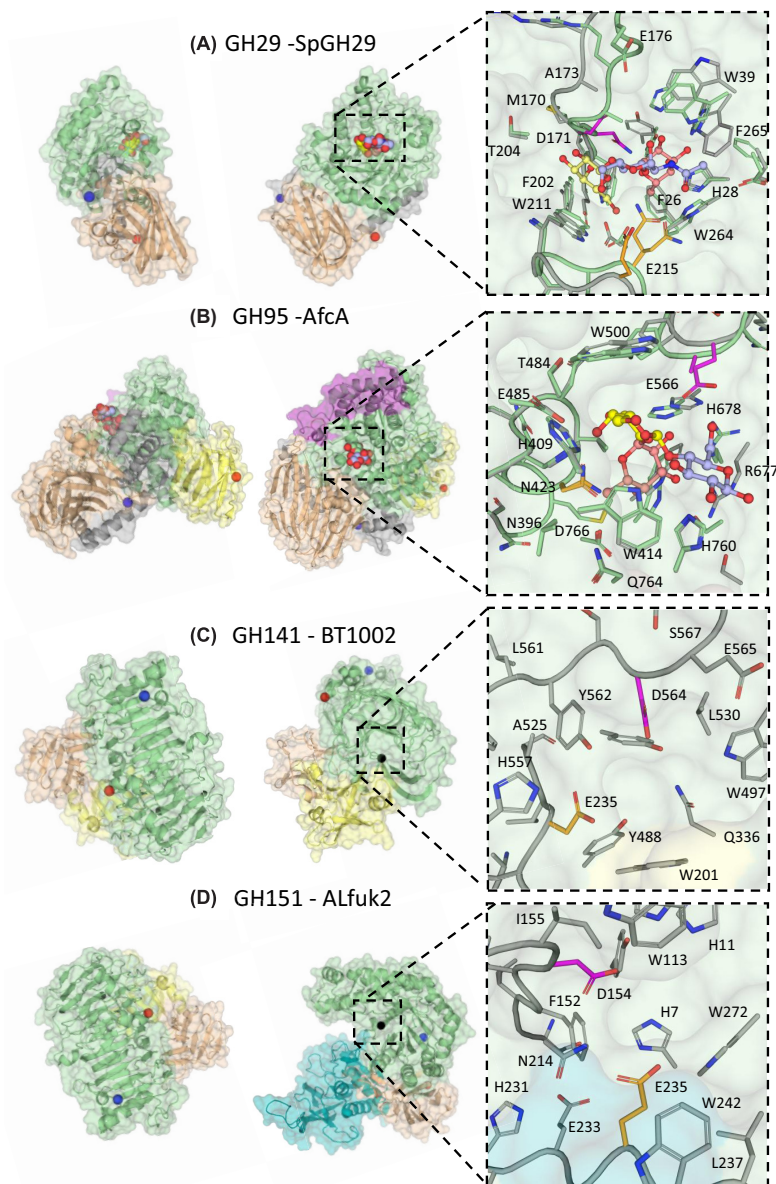

**Figure 2. Crystal structures of microbial  $\alpha$ -L-fucosidases from different GH families with close up of active sites**

Catalytic modules are shown in green and  $\beta$ -sandwich domains that may have carbohydrate binding properties in light brown and yellow. Catalytic nucleophile residues are coloured magenta and catalytic acid/base residues are coloured in orange. Where possible WT apo crystal structures (grey) have been aligned to their corresponding inactive mutant crystal structures (green) to highlight residue movements upon binding to a substrate like ligand. The N- and C-termini are indicated with blue and red spheres, respectively. Surface representation views are related by a  $90^\circ$  rotation around the y axis. If a substrate complex is not available, the location of the active site is indicated with a black sphere. **(A)** GH29 fucosidase (SpGH29, apo PDB = [6ORG](#); [D171N](#); [E215Q](#) mutant in complex with Le<sup>x</sup> PDB = [6ORF](#)). The catalytic domain comprises residues 11–317 and the C terminal  $\beta$ -sandwich module comprises residues 318–451. The bound ligand is shown with Fuc (light red), Gal (yellow) and GlcNAc (light blue). **(B)** GH95 fucosidase (AfcA, apo PDB = [2EAB](#); [E566A](#) mutant in complex with substrate PDB: [2EAD](#)). The catalytic domain comprises residues 80–133 and 387–778, the N-terminal domain (in light brown) residues 9–79 and 134–293, and the C-terminal  $\beta$ -sandwich module (in yellow) residues 779–896. There is a helical barrel protruding from the N-terminal domain, residues 80–133. The substrate is shown with Gal (yellow), Fuc (light red) and Glc (light blue). **(C)** GH141 fucosidase (BT1002, apo PDB = [5MQP](#)). The catalytic domain comprises residues 1–108 and 296–619, the ancillary  $\beta$ -sandwich domain, residues 109–295 (in yellow for residues 151–251 and in wheat for residues 109–251 and 252–295, according to visual separation into sub domains). **(D)** GH151 fucosidase (ALfuk2, apo PDB = [6TVK](#)). The catalytic domain covers residues 1–336, the C-terminal domain (in wheat), residues 560–660 and the Rossman fold domain (in teal), residues 341–558.

(Fibrobacteres-Chlorobi-Bacteroidetes super phylum) group (24%) and Proteobacteria group (27%) in agreement with previous analyses [44]. Compared with GH29 fucosidases, about half of sequences (4890) are assigned to the GH95 family, 97% of which are from bacteria, with a similar distribution as for the GH29 family between the Terrabacteria (46%), FCB (29%), Proteobacteria (18%) groups. In contrast, GH139, GH141 and GH151 are smaller families comprising 254, 1043 and 203 members, respectively, mostly from bacterial origin (95% of GH139, 98% of GH141 and 99% of GH151). Altogether, these data indicate that about 96.5% of known fucosidase sequences are of bacterial origin [45]. There is also high variation and level of redundancy of putative fucosidase-encoding genes within a given bacterial genome with up to 21 GH29 encoding genes and up to 10 GH95 encoding genes found per genome, while the reported number of genes encoding GH139, GH141 and GH151 does not exceed two per genome (see Supplementary Table S1). In this mini review, we will describe the enzymatic and structural properties of  $\alpha$ -L-fucosidases produced by microbes and provide an overview of their biological function and biotechnological applications.

## Enzymatic and structural properties of fucosidases GH29 fucosidases

Based on sequence analysis, GH29 fucosidases are predicted to be extracellular (secreted, membrane-attached or periplasm) or intracellular, depending on the metabolic pathways of microbes inhabiting various environments. However, this is rarely validated experimentally and the presence or absence of a signal peptide does not always accurately reflect their location [46]. Functionally characterised GH29 fucosidases from microbes are active within a broad pH range, from 3.3 to 9, with a majority of enzymes showing a preference for neutral conditions (Table 1). The optimum temperature for GH29 gut microbial fucosidases is around 37°C while marine-derived microbial fucosidases optimum temperatures are normally below 30°C (Table 1). The highest optimal temperature for microbial GH29 fucosidases reported so far is 95°C, which is for Ss $\alpha$ -fuc isolated from *Sulfolobus solextreme* P2 in hot springs (Table 1).

GH29 enzymes display broad substrate specificities covering  $\alpha$ -1,2,  $\alpha$ -1,3,  $\alpha$ -1,4 and  $\alpha$ -1,6 fucosylated linkages. Based on sequence homology and substrate specificity, GH29 enzymes are divided into two subfamilies, GH29A and GH29B [47]. In general, GH29A enzymes show higher activity towards synthetic aryl substrates such as 4-nitrophenyl  $\alpha$ -L-fucopyranoside (pNP-Fuc) or 2-chloro-4-nitrophenyl- $\alpha$ -L-fucopyranoside (CNP-Fuc) compared with GH29B enzymes, while it is common for GH29B not to be active on these chromogenic substrates [46,48–51]. The  $K_m$  values against aryl-Fuc for functionally characterised GH29 enzymes are in the  $\mu$ M to mM range, and the  $k_{cat}$  values vary from  $10^{-3}$  to  $10^2$  s $^{-1}$ . Their catalytic efficiency as estimated from  $k_{cat}/K_m$  varies from  $10^{-6}$  to  $10^2$  s $^{-1}$   $\mu$ M $^{-1}$  (Table 1). In addition, GH29B enzymes usually act on  $\alpha$ -1,3/4 fucosylated linkages rather than  $\alpha$ -1,2, whereas members of the GH29A subfamily show a more relaxed linkage specificity (Figure 3). To date, crystal structures are available from 16 microbial GH29 enzymes originating from 12 different microorganisms. Among them, BT2192 from *B. thetaiomicon* VPI-5482 [29] and BpGH29 from *Bacteroides plebeius* DSM 17135 [38] have  $\alpha$ -galactosidase activities while ClAgl29A and ClAgl29B from *Cecemia lonarensis* LW9 were shown to be  $\alpha$ -glucosidases [52]. GH29 enzymes are characterised by the lack of  $\alpha$ -helix ( $\alpha$ 5) between  $\beta$ 5 and  $\beta$ 6 of TIM barrels [30,36]. The catalytic nucleophile and acid/base residues are located at the end of  $\beta$ 4 and  $\beta$ 6 strands, respectively. While the catalytic nucleophile in GH29 is a conserved Asp, the general acid/base residue is subfamily-dependent. In GH29B enzymes, the acid/base residue based is generally conserved based on sequence alignment with experimentally validated E249 of BT4136 and BT1625 from *B. thetaiomicon* VPI-5482. In SpGH29 from *Streptococcus pneumoniae* TIGR4, the assignment of E215 as acid/base was also confirmed by X-ray crystallography [34] (Figure 2A). Here, the D171 (nucleophile) and E215 (acid/base) of SpGH29 are located between the Fuc and GlcNAc residues, corresponding to the -1 and pseudo +1 subsite, respectively. The Gal within +2' subsite makes hydrophobic interactions with W211 and hydrogen bonds to the nucleophile and D257, which, together with the -1 subsite, contributes to the  $\alpha$ -1,3/4 fucosidase activity [34]. In contrast to GH29B fucosidases, the acid/base residues of GH29A enzymes show poor alignment across primary sequences, although they can be spatially overlapped with the acid/base residues from GH29B enzymes in their substrate-bound states but not free states [53]. However, the GH29A/B classification does not always accurately predicts linkage preferences [46,54,55] as enzymes from the same subfamily can show various substrate specificities (Table 1 and Figure 3).

Some functionally characterised bacterial GH29 fucosidases have only been reported to be active against artificial substrates, such as BF0810 from *Bateroides fragilis* NCTC 9343 [56], Fp240 and Fp251 from *Paraglaciecola* sp. [57]. Further investigation is required to determine their specificity towards natural substrates. GH29 fucosidases often present limited activity towards Lewis antigen glycan epitopes decorated with a sialic acid [48,58,59], which is ubiquitously found in antennary human N- and O-glycans. In contrast, the GH29 fucosidase E1\_10125 from the gut



**Table 1** Physiochemical and kinetic parameters of functionally characterised GH29  $\alpha$ -L-fucosidases

| Taxonomy            | Source           | Organism                                                       | GenBank ID                                | SP | Subfamily      | Opt pH  | OptT/°C | $K_m$ ( $\mu$ M)   | $k_{cat}$ ( $s^{-1}$ )         | $k_{cat}/K_m$ ( $s^{-1} \mu M^{-1}$ )  | Refs    |
|---------------------|------------------|----------------------------------------------------------------|-------------------------------------------|----|----------------|---------|---------|--------------------|--------------------------------|----------------------------------------|---------|
| Archaea             | Hot springs      | <i>Sulfolobus solfataricus</i> P2                              | Ss $\alpha$ -fuc/AAK43160.1<br>AAK43159.1 | N  | A              | 3.3–6.3 | 95      | 28 $\pm$ 4         | 287 $\pm$ 11                   | 10.25                                  | [111]   |
| FCB Group           | Gut              | <i>Bacteroides thetaiotaomicron</i> VPI-5482                   | BT1625/AAO76732.1                         | Y  | B              | –       | –       | 3200 $\pm$ 700     | 0.37 $\pm$ 0.03                | (113 $\pm$ 3) $\times 10^{-6}$         | [53]    |
| FCB Group           | Gut              | <i>Bacteroides thetaiotaomicron</i> VPI-5482                   | BT2970/AAO78076.1                         | Y  | A              | 6       | 37      | 2600 $\pm$ 500     | 0.53 $\pm$ 0.03                | (2 $\pm$ 0.5) $\times 10^{-4}$         | [47,53] |
| FCB Group           | Gut              | <i>Bacteroides thetaiotaomicron</i> VPI-5482                   | BT4136/AAO79241.1                         | Y  | B              | –       | –       | 4500 $\pm$ 400     | 0.45 $\pm$ 0.03                | (98 $\pm$ 12) $\times 10^{-6}$         | [53]    |
| FCB Group           | Warm spring      | <i>Emticicia oligotrophica</i>                                 | Eo0918/AFK04462.1                         | N  | B <sup>3</sup> | 6–7     | 30–45   | 750 $\pm$ 110      | 3.73 $\pm$ 0.31                | 4.9 $\times 10^{-3}$ <sup>2</sup>      | [113]   |
| FCB Group           | Warm spring      | <i>Emticicia oligotrophica</i>                                 | Eo3066/AFK02389.1                         | N  | A <sup>3</sup> | 6–7     | 30–45   | 8630 $\pm$ 1730    | 0.04 $\pm$ 0.01                | 4.6 $\times 10^{-6}$ <sup>2</sup>      | [113]   |
| FCB Group           | Warm spring      | <i>Emticicia oligotrophica</i>                                 | Eo3812/AFK05193.1                         | N  | A <sup>3</sup> | 6–7     | 30–45   | 8410 $\pm$ 2060    | 3.61 $\pm$ 0.23                | 4.3 $\times 10^{-4}$ <sup>2</sup>      | [113]   |
| FCB Group           | Oral             | <i>Tannerella forsythia</i> ATCC 43037                         | TfFuc1/AEW21393.1                         | N  | A <sup>3</sup> | 9       | –       | 670 $\pm$ 200      | 17.27 $\pm$ 0.68 <sup>1</sup>  | 0.026 <sup>2</sup>                     | [114]   |
| FCB Group           | Lymphoma patient | <i>Elizabethkingia meningoseptica</i> FMS-007                  | cFase<br>I/WP_047034007.1                 | Y  | A <sup>3</sup> | 4.5     | 55      | 600 $\pm$ 50       | 0.14 $\pm$ 0.003               | (232 $\pm$ 6.7) $\times 10^{-6}$       | [55]    |
| FCB Group           | Marine           | <i>Wenyngzhuangia fucanilytica</i> CZ1127 <sup>T</sup>         | Alf1_Wf/ANW96380.1                        | Y  | A              | 7       | 30      | 3300 $\pm$ 420     | 5.44                           | 1.65 $\times 10^{-3}$                  | [32]    |
| FCB Group           | Marine           | <i>Wenyngzhuangia fucanilytica</i> CZ1127 <sup>T</sup>         | FucWf1/ANW96121.1                         | Y  | A              | 6.3     | 25      | 500                | 19.94 $\pm$ 4.13 <sup>1</sup>  | 0.040 <sup>2</sup>                     | [46]    |
| FCB Group           | Marine           | <i>Wenyngzhuangia fucanilytica</i> CZ1127 <sup>T</sup>         | FucWf2/ANW96113.1                         | Y  | A              | 6.3     | 25      | 670                | 5.88 $\pm$ 0.82 <sup>1</sup>   | 8.8 $\times 10^{-3}$ <sup>2</sup>      | [46]    |
| FCB Group           | Marine           | <i>Wenyngzhuangia fucanilytica</i> CZ1127 <sup>T</sup>         | FucWf3/ANW96108.1                         | Y  | A              | 6.3     | 30      | 2210               | 0.20 $\pm$ 0.34 <sup>1</sup>   | 9.0 $\times 10^{-5}$ <sup>2</sup>      | [46]    |
| FCB group           | Marine           | <i>Flavobacterium algicola</i> 12076                           | OUC-Jdch16/MW767957.1                     | Y  | A <sup>3</sup> | 6       | 25      | 1043               | 16.25 <sup>1</sup>             | 0.016 <sup>2</sup>                     | [122]   |
| FCB group           | Plant            | <i>Spirosoma linguale</i> DSM74                                | SIFuc29/ADB37178.1                        | Y  | A <sup>3</sup> | 5       | 50      | 180 $\pm$ 42       | 154.4                          | 0.88                                   | [123]   |
| Proteobacteria      | Plant            | <i>Xanthomonas campestris</i> pv.campestris str. ATCC 33913    | NixE/AAM42160.1                           | Y  | A              | 5       | 37      | 700 $\pm$ 100      | 6.1 $\pm$ 2.0                  | 8.7 $\times 10^{-3}$ <sup>2</sup>      | [117]   |
| Proteobacteria      | Marine           | <i>Paraglaciecola</i> sp.                                      | Fp231/MW623630.1                          | Y  | A              | 5.6–6.0 | 25      | 140 $\pm$ 10       | 31 $\pm$ 0.5                   | 0.221                                  | [57]    |
| Proteobacteria      | Marine           | <i>Vibrio</i> sp. strain EJY3                                  | VejFCD/AEX22740.1                         | N  | A <sup>3</sup> | –       | –       | 6700 $\pm$ 500     | 4.6 $\pm$ 1.4                  | 6.9 $\times 10^{-4}$ <sup>2</sup>      | [37]    |
| PVC group           | Gut              | <i>Akkermansia muciniphila</i> Muc <sup>T</sup> (ATCC BAA-835) | Amuc.0010/ACD03857.1                      | Y  | A <sup>3</sup> | 5.6     | –       | 841.23 $\pm$ 46.72 | 378.33                         | 0.45                                   | [75]    |
| Terrabacteria group | Gut              | <i>Bifidobacterium longum</i> subsp. infantis ATCC 15697       | Blon_2336/ACJ53394.1                      | N  | B              | 6–7.5   | 37      | 709 $\pm$ 149      | 0.285 $\pm$ 0.024              | (407.73 $\pm$ 51.34) $\times 10^{-6}$  | [63]    |
| Terrabacteria group | Gut              | <i>Bifidobacterium longum</i> subsp. infantis ATCC 15697       | Blon_0248/ACJ51376.1                      | N  | A              | 6–7.5   | 37      | 131 $\pm$ 10       | 0.110 $\pm$ 0.026              | (833.31 $\pm$ 134.64) $\times 10^{-6}$ | [63]    |
| Terrabacteria group | Gut              | <i>Bifidobacterium longum</i> subsp. infantis ATCC 15697       | Blon_0426/ACJ51546.1                      | N  | A              | 6–7.5   | 37      | 180 $\pm$ 30       | 4.481 $\pm$ 0.329              | (24.95 $\pm$ 1.69) $\times 10^{-3}$    | [63]    |
| Terrabacteria group | Gut              | <i>Streptosporangium roseum</i>                                | SrFucNaFLD/ACZ87343.1                     | Y  | A              | 5.6–7.5 | 37      | 10.59 $\pm$ 2.64   | 0.104 $\pm$ 0.026 <sup>1</sup> | 9.8 $\times 10^{-3}$ <sup>2</sup>      | [118]   |

Continued over

**Table 1** Physiochemical and kinetic parameters of functionally characterised GH29  $\alpha$ -L-fucosidases (Continued)

| Taxonomy            | Source     | Organism                              | GenBank ID                 | SP | Subfamily      | Opt pH | OptT/°C | $K_m$ ( $\mu$ M)  | $k_{cat}$ ( $s^{-1}$ )         | $k_{cat}/K_m$ ( $s^{-1} \mu$ M $^{-1}$ ) | Refs  |
|---------------------|------------|---------------------------------------|----------------------------|----|----------------|--------|---------|-------------------|--------------------------------|------------------------------------------|-------|
| Terrabacteria group | Gut        | <i>Lactobacillus casei</i> BL23       | AlfA/CAQ67115.1            | N  | A              | 7.5    | 39      | 270               | 0.855 <sup>1</sup>             | $3.2 \times 10^{-3.2}$                   | [119] |
| Terrabacteria group | Gut        | <i>Lactobacillus casei</i> BL23       | AlfB/CAQ67877.1            | N  | A              | 7      | 41      | 2900              | 4.71                           | $1.6 \times 10^{-3.2}$                   | [119] |
| Terrabacteria group | Gut        | <i>Lactobacillus casei</i> BL23       | AlfC/CAQ67984.1            | N  | A              | 7      | 41      | 5200              | 16.28 <sup>1</sup>             | $3.1 \times 10^{-3.2}$                   | [119] |
| Terrabacteria group | Hot spring | <i>Paenibacillus</i> sp.3179          | PsFuc/QEX52072.1           | N  | A <sup>3</sup> | 7.4    | 50      | $1110 \pm 750$    | $(3 \pm 1) \times 10^{-3.1}$   | $2.7 \times 10^{-3.2}$                   | [124] |
| Terrabacteria group | Gut        | <i>Ruminococcus gnavus</i> E1         | E1.10125/-                 | Y  | B              | 6      | –       | $237.9 \pm 39.69$ | $(18 \pm 0.88) \times 10^{-4}$ | $7.61 \times 10^{-3}$                    | [33]  |
| Terrabacteria group | Gut        | <i>Ruminococcus gnavus</i> ATCC 29149 | ATCC.03833/ WP.004844769.1 | N  | A              | 6      | –       | $179.1 \pm 28.77$ | $83.6 \pm 2.97$                | 467                                      | [33]  |
| Thermotogae         |            | <i>Thermotoga maritima</i>            | Thma/AAD35394.1            | N  | A              | 7      | –       | $550 \pm 30$      | $12.6 \pm 0.47$                | $0.023 \pm 0.007$                        | [74]  |
| Unclassified        | Soil       | Soil metagenome                       | Mfuc1/AIC77298.1           | N  | A              | 7      | –       | $110 \pm 10$      | $1.33 \pm 0^1$                 | $0.012^2$                                | [74]  |
|                     | Soil       | Soil metagenome                       | Mfuc2/AIC77299.1           | N  | A              | 7      | –       | $140 \pm 10$      | $1.92 \pm 0.08^1$              | $0.014^2$                                | [74]  |
|                     | Soil       | Soil metagenome                       | Mfuc4/AIC77301.1           | N  | A              | 7      | –       | $71 \pm 10$       | $0.64 \pm 0.02^1$              | $9.0 \times 10^{-3.2}$                   | [74]  |
|                     | Soil       | Soil metagenome                       | Mfuc5/AIC77302.1           | N  | A              | 7      | –       | $1900 \pm 40$     | $1.58 \pm 0.03^1$              | $8.3 \times 10^{-4.2}$                   | [74]  |
|                     | Soil       | Soil metagenome                       | Mfuc6/AIC77303.1           | N  | A              | 9      | –       | $400 \pm 50$      | $0.47 \pm 0.04^1$              | $1.2 \times 10^{-3.2}$                   | [74]  |
|                     | Soil       | Soil metagenome                       | Mfuc7/AIC77304.1           | N  | A              | 6      | –       | $280 \pm 50$      | $1.83 \pm 0.13^1$              | $6.5 \times 10^{-3.2}$                   | [74]  |

Note: kinetic parameters were obtained using aryl-Fuc substrates.

<sup>1</sup>Estimated from reported  $V_{max}$  ( $\mu$ mol/L/min/mg) and molecular weight (g/mol, MW) using  $k_{cat}$  ( $s^{-1}$ ) =  $V_{max} \times MW/1000/60$ .

<sup>2</sup>Based on  $k_{cat}/K_m$ .

–, Data unavailable.

<sup>3</sup>Predicted based on sequence analysis.

FCB, Fibrobacteres-Chlorobi-Bacteroidetes super phylum; Opt, optimal; PVC, Planctomycetes-Verrucomicrobia-Chlamydiae bacterial superphylum; SP, signal peptide.

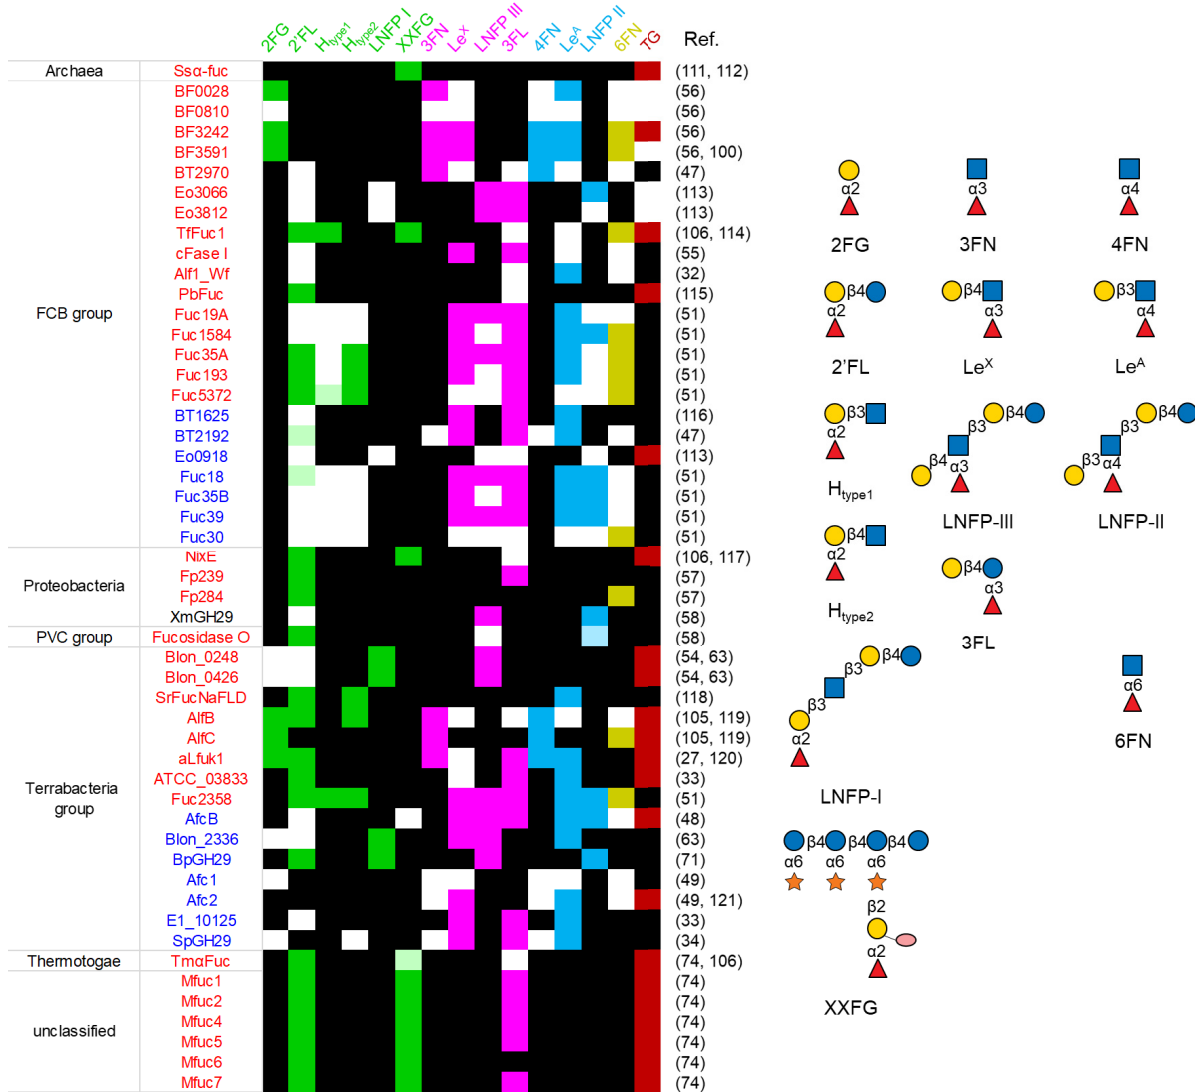

**Figure 3. Substrate specificity of microbial GH29  $\alpha$ -L-fucosidases**

The  $\alpha$ 1,2 substrates are colored in green,  $\alpha$ 1,3 in pink,  $\alpha$ 1,4 in sky blue, and  $\alpha$ 1,6 in olive. Light versions of the above colors indicate trace activity. Black boxes correspond to no enzymatic activity and empty boxes indicate lack of data. GH29A and GH29B  $\alpha$ -L-fucosidases are coloured in red and blue, respectively; FCB, Fibrobacteres-Chlorobi-Bacteroidetes super phylum; PVC, Planctomycetes-Verrucomicrobia-Chlamydiae bacterial superphylum; TG, transglycosylation capability. Glycan structures presentation according to Symbol Nomenclature for Glycans (SNFG) [109,110].

symbiont *Ruminococcus gnavus* E1, was found to be active towards Lewis antigen glycan epitopes irrespective of the presence of terminal sialic acid [33]. Interestingly, E1\_10125 showed stronger binding affinity and catalytic efficiency towards sialyl-Lewis X (sLe<sup>X</sup>) than Lewis X (Le<sup>X</sup>), as shown by isothermal titration calorimetry, saturation transfer difference NMR and kinetic assays [33]. X-ray crystallography, molecular dynamics simulation and docking showed that sLe<sup>X</sup> could be accommodated within the binding site of E1\_10125 fucosidase. It is likely that other microbial fucosidases may also be able to accommodate a terminal sialic acid in their binding pocket although this remain to be demonstrated experimentally [50]. In addition, microbial GH29 fucosidases have been reported to carry out transglycosylation reactions due to their retaining mechanism of action, as recently reviewed elsewhere [60,61].

## GH95 fucosidases

Compared to the GH29 family, GH95 fucosidases have been far less characterised. According to the CAZy database, currently the crystal structures of four GH95 fucosidases have been solved (PDB code: 4UFC, 2EAB, 2RDY, 7KMQ) [39–41]. The catalytic domain of GH95 adopts an ( $\alpha/\alpha$ )<sub>6</sub>-barrel fold, as illustrated with AfcA from *Bifidobacterium bifidum* JCM 1254 (Figure 2B). Here, the general acid residue E566 and base residues N421/N423 were experimentally validated by site-directed mutagenesis and structural analysis [39]. These catalytic residues, together with other conserved residues such as E485 and D766, are part of a deep negatively-charged substrate-binding pocket (Figure 2B). The crystal structure of the complex between E566A inactive mutant and 2'-fucosyllactose (2'FL) revealed tighter interactions with Fuc and Gal moiety than with Glc, and site-directed mutagenesis further supported the importance of the hydrogen bond between Gal and E485 for catalysis [39] (Figure 2B).

The optimal pH for most characterised GH95 fucosidases has been shown to be between pH 6 to 7 [33,41,46,62–64] with some enzymes showing an optimum pH 5 [65–67] whereas BcFucA from *Bacillus cereus* 2-8 [68] and Afc3 from *Clostridium perfringens* ATCC 13124 [49] showed optimal pH of 4 and 8, respectively (Table 2). The optimal temperature of GH95 fucosidases varies from 25°C for FucWf5 from *Wenyngzhuangia fucanilytica* CZ1127<sup>T</sup> [46] to 60°C for both AfcA from *B. bifidum* JCM 1254 [65] and Afc3 [49] (Table 2).

Individually, GH95 enzymes have been shown to have strict substrate specificities, acting preferentially on  $\alpha$ -1,2 fucose linkages found in HMOs, mammalian O-glycans and fucosylated xyloglucan in dicots [34,49,64–67,69]. Some GH95 enzymes revealed a more relaxed activity on  $\alpha$ -1,3/4/6 fucose linkages [62,63,70,71]. In addition, two GH95 enzymes were shown to have  $\beta$ -L-galactosidase activity [40,42] (Table 2).

## GH139 and GH141 fucosidases

Currently, there are two functionally characterised GH141 enzymes in the CAZy database. BT1002 from *B. thetaiotaomicron* VPI-5482, the founding member of the GH141 family, is an endo-acting enzyme releasing 2-O-methyl-D-xylose- $\alpha$ -1,3-L-fucose disaccharide from the chain A of the complex pectin rhamnogalacturonan-II (RG-II) [42]. The catalytic domain of BT1002 folds into a right-handed parallel  $\beta$  helix (Figure 2C). The solvent-exposed surface representation of the catalytic centre of BT1002 reveals an extended catalytic pocket that may assist the accommodation of the disaccharide containing xylose and Fuc. Site directed mutagenesis revealed that putative nucleophile D523 and general acid/base D564 located in the binding pocket were critical for L-Rhap- $\alpha$ -1,3-D-Apif- $\alpha$ -1,4-D-MeXylp-L-Fucp hydrolysis [42]. The second member of the GH141 family is in fact a xylanase, Cthe\_2195 from *Acetivibrio thermocellus* ATCC 27405 (previously known as *Clostridium thermocellum*) [72], which showed no activity on aryl-Fuc substrate.

The only characterised member of the GH139 family, BT0984 from *B. thetaiotaomicron* VPI-5482 is a  $\alpha$ -2-O-methyl-L-fucosidase targeting 2-O-methyl-L-Fuc- $\alpha$ -1,2-D-Galp linkage from chain B of RG-II glycan [42]. The catalytic mechanism and crystal structure of GH139 enzymes remain to be determined.

## GH151 fucosidases

Some initially classified GH29 enzymes including Blon\_0346 from *Bifidobacterium longum* subsp. infantis ATCC 15697 [63],  $\alpha$ -L-fucosidase isoenzyme iso2 from *Paenibacillus thiaminolyticus* [73], and Mfuc3 isolated from soil bacteria [74] were recently reclassified into the new GH151 family due to low sequence identity with all other known GH families. GH151 fucosidases have been shown to be active on aryl-Fuc and disaccharides where Fuc is linked to Gal via  $\alpha$ -1,2 linkage or to GlcNAc via  $\alpha$ -1,2/3/4/6 linkages, but no activity was detected on fucosyl trisaccharides or hexasaccharide Globo H with L-Fuc- $\alpha$ -1,2-D-Galp epitope [43]. Recently the first crystal structure of a GH151 fucosidase, ALfuk2, has been reported from *Paenibacillus thiaminolyticus* [43] (Figure 2D). The catalytic domain of ALfuk2 formed the ( $\beta/\alpha$ )<sub>8</sub> barrel with the nucleophile D154 and general acid/base E235, assigned based on site-directed mutagenesis, apo structural analysis, protein-ligand docking and a mixed quantum mechanical/molecular mechanical (QM/MM) calculation, located in terminal position of  $\beta$ 4 and  $\beta$ 6 strands, respectively [43]. Interestingly, GH151 revealed a unique oligomeric assembly across  $\alpha$ -L-fucosidases families and the involvement of active site complementation from adjacent monomers with catalytic residues forming the active site cavity together with His503 from an adjacent monomer (Figure 1D). Mutation of His503 to Ala affected the substrate binding, enzymatic activity and optimal pH of 6.5, suggesting new catalytic features requiring further investigation [43].



**Table 2** Physicochemical parameters and substrate specificity of functionally characterised GH95  $\alpha$ -L-fucosidases

| Microbes                                                        | Protein name       | GenBank ID                 | SP | Opt pH | Opt. T/°C | Fucosidase activity reported on                                                                            | No reported activity on                                                                                                                                                                                                                                                                                                                                                                                                                                                                                                                                                                                     | Refs |
|-----------------------------------------------------------------|--------------------|----------------------------|----|--------|-----------|------------------------------------------------------------------------------------------------------------|-------------------------------------------------------------------------------------------------------------------------------------------------------------------------------------------------------------------------------------------------------------------------------------------------------------------------------------------------------------------------------------------------------------------------------------------------------------------------------------------------------------------------------------------------------------------------------------------------------------|------|
| <i>Bacteroides fluxus</i> YIT 12057                             | BfGH95             | EGF57198.1                 | Y  | 6.0    | –         | CNP-Fuc, 2'FL, 3FL, XXFG, XLFG                                                                             | –                                                                                                                                                                                                                                                                                                                                                                                                                                                                                                                                                                                                           | [62] |
| <i>Bacteroides ovatus</i> ATCC 8483                             | BACOVA_03438       | ALJ48339.1                 | Y  | –      | –         | corn glucuronoarabinoxylan <sup>#</sup>                                                                    | 2'FL and CNP-Fuc*                                                                                                                                                                                                                                                                                                                                                                                                                                                                                                                                                                                           | [40] |
| <i>Bacteroides thetaiotaomicron</i> VPI-5482                    | BT1010             | AAO76117.1                 | Y  | –      | –         | chain A of RGII <sup>#</sup>                                                                               | pNP linked $\beta$ -D-Glc/ $\alpha$ -L- Rha/ $\alpha$ -L-Arap/ $\beta$ -D-Xyl/ $\alpha$ -D-Gal                                                                                                                                                                                                                                                                                                                                                                                                                                                                                                              | [42] |
| <i>Bacteroides uniformis</i> ATCC 8492                          | BuGH95             | EDO56039.1                 | Y  | 6.0    | –         | CNP-Fuc, 2'FL, 3'FL, XXFG, XLFG                                                                            | –                                                                                                                                                                                                                                                                                                                                                                                                                                                                                                                                                                                                           | [62] |
| <i>Bifidobacterium bifidum</i> JCM 1254                         | AfcA               | AAQ72464.1                 | Y  | 5.0    | 60        | 2'FL, LNFP-I, H <sub>type2</sub>                                                                           | 3FL, LNFP-II, LNFP-V, A <sub>type 2 tri</sub> , B <sub>type 2 tri</sub> , 6-fucosyl-N, N'-diacetylchitobiose                                                                                                                                                                                                                                                                                                                                                                                                                                                                                                | [65] |
| <i>Bifidobacterium longum</i> subsp. <i>infantis</i> ATCC 15697 | Blon_2335          | ACJ53393.1                 | N  | 6–7.5  | 37        | CNP-Fuc, 2'FL, 3'FL, 2FG                                                                                   | –                                                                                                                                                                                                                                                                                                                                                                                                                                                                                                                                                                                                           | [63] |
| <i>Cellvibrio japonicus</i> Ueda107                             | CjAfc95A           | ACE83895.1                 | Y  | 6.5    | –         | CNP-Fuc, XLFG, XXFG, lettuce xyloglucan                                                                    | pNP linked $\beta$ -D-Glc/ $\beta$ -D-Gal/ $\beta$ -D-Xyl/ $\alpha$ -L-Ara                                                                                                                                                                                                                                                                                                                                                                                                                                                                                                                                  | [64] |
| <i>Clostridium perfringens</i> ATCC 13124                       | Afc3               | ABG82552.1                 | Y  | 8      | 60        | 2FG, PGM                                                                                                   | pNP-Fuc, Le <sup>A</sup> , Le <sup>X</sup> , 3FN, 4FN, 6FN                                                                                                                                                                                                                                                                                                                                                                                                                                                                                                                                                  | [49] |
| <i>Dysgonomonas gadei</i> ATCC BAA-286                          | DgGH95             | EGJ99268.1                 | Y  | 6.0    | –         | CNP-Fuc, 2'FL, 3'FL, 6FN, XXFG, XLFG                                                                       | –                                                                                                                                                                                                                                                                                                                                                                                                                                                                                                                                                                                                           | [62] |
| <i>Ruminococcus gnavus</i> ATCC 29149                           |                    | QHB24557.1<br>RUMGNA_00842 | Y  | 6      | –         | pNP-Fuc, 2'FL, 3FL                                                                                         | Le <sup>A</sup> , Le <sup>X</sup>                                                                                                                                                                                                                                                                                                                                                                                                                                                                                                                                                                           | [33] |
| <i>Streptococcus pneumoniae</i> TIGR4                           | SpGH95             | AAK75733.1                 | N  | –      | –         | 2FL, 2FG, H <sub>type1</sub> , H <sub>type2</sub> , H <sub>type3</sub> , Le <sup>B</sup> , Le <sup>Y</sup> | 3FN, 4FN, 6FN, 3FL, A <sub>type 2 tetra</sub> , B <sub>type 2 tetra</sub> , Le <sup>A</sup> , Le <sup>X</sup>                                                                                                                                                                                                                                                                                                                                                                                                                                                                                               | [34] |
| <i>Xanthomonas citri</i> pv. <i>citri</i> str. 306              | XAC1774 (XacAfc95) | AAM36638.1                 | Y  | 6.0    | 55        | pNP-Fuc                                                                                                    | pNP linked $\alpha$ -D-Gal/ $\alpha$ -D-Glc/ $\alpha$ -D-Man/ $\alpha$ -D-Xyl/ $\alpha$ -L-Araf/ $\alpha$ -L-Arap/ $\alpha$ -L-Rha/ $\beta$ -D-Cellobioside/ $\beta$ -D-Fuc/ $\beta$ -D-Gal/ $\beta$ -D-Glc/ $\beta$ -D-Man/ $\beta$ -D-Xyl, arabinan, arabinogalactan, arabinoxylan, Avicel PH-101, $\beta$ -1,4-glucobiose, CM-cellulose, CM-curdlan, curdian, galactan, galactomannan, polygalacturonic acid, glucomannan, galactan, laminarin, lichenan, mannan, pachyman, CM-pachyman, pectin, pululan, reduced pululan, RG-I, RG, xanthan gum, xylan, amyloid xyloglucan, xyloglucan, $\beta$ -glucan | [41] |
| <i>Arabidopsis thaliana</i>                                     | AtFuc95A           | CAB36703.1                 | Y  | 5      | –         | 2'FL, XXFG, xyloglucan                                                                                     | pNP-Fuc, 3'FL, LNFP-II, LNFP-III, $\alpha$ -1,6 fucosylated chitopentaose                                                                                                                                                                                                                                                                                                                                                                                                                                                                                                                                   | [66] |
| <i>Aspergillus nidulans</i> FGSC A4                             | AN8149.2           | EAA59171.1                 | Y  | –      | –         | Cotton xyloglucan oligomers                                                                                | pNP-Fuc                                                                                                                                                                                                                                                                                                                                                                                                                                                                                                                                                                                                     | [69] |
| <i>Wenyinzhuangia fucanilytica</i> CZ1127                       | FucWf5             | ANW96103.1                 | N  | 6.3    | 25        | pNP-Fuc, terminal $\alpha$ -1,3/4 fucose in fucoidan fragments                                             | –                                                                                                                                                                                                                                                                                                                                                                                                                                                                                                                                                                                                           | [46] |

–, data unavailable.

FCB, Fibrobacteres-Chlorobi-Bacteroidetes super phylum; Opt, optimal; PVC, Planctomycetes-Verrucomicrobia-Chlamydiae bacterial superphylum; SP, signal peptide.

<sup>#</sup>L-Gal release.

\*trace activity.

## Insights into the biological role of microbial fucosidases

Gut microbes such as *Bifidobacteria* species [63], *B. thetaiotaomicron* [47], *R. gnavus* [33] or *Akkermansia muciniphila* [75] have been shown to produce multiple fucosidases that cleave Fuc from host glycans, underscoring their importance for the fitness and adaptation of these bacteria to the gut environment (Supplementary Table S1). The capability of removing  $\alpha$ -L-fucosyl residues from free oligosaccharides and glycoconjugates conferred fucosidase-possessing microbes a competitive advantage in mucin glycan foraging [14], and in turn help maintain intestinal homeostasis [76,77]. Fucosidases from commensal bacteria also play a role in cross-feeding with other members of the gut microbiota [78,79] or enteric pathogens such as *Salmonella enterica* serovar Typhimurium, *Clostridium difficile*, [80], *Campylobacter jejuni* [81,82] and other pathogens [83] facilitating their infection. Recently,  $\alpha$ -L-fucosidases from the GH29 family were identified and characterised from the metagenome of faecal samples of breastfed infants. This analysis revealed a remarkably high number of GH29  $\alpha$ -L-fucosidases present in the infant intestinal environment with high sequences identity (above 98% identity) with  $\alpha$ -L-fucosidases from *B. thetaiotaomicron*, *Bacteroides caccae*, *Phocaeicola vulgatus*, *Phocaeicola dorei*, *R. gnavus*, and *Streptococcus parasanguinis* (Supplementary Table S1). These enzymes showed different substrate specificities toward HMOs, blood group antigens, and glycoproteins [51]. GH95 fucosidases were also identified in the infant faecal microbiome from *B. longum subsp. infantis*, *B. thetaiotaomicron*, *B. caccae*, *R. gnavus*, *P. vulgatus*, and *P. dorei* (Supplementary Table S1). The variety of  $\alpha$ -L-fucosidases may provide these species with an advantage in colonising the gut of infants and adults.

Novel tools have been developed to further investigate the biological roles of microbial fucosidases. For example, activity-based probes (ABP) have been used to identify their functional state, spatial and temporal distribution [84]. Cyclophellitol epoxides/aziridine, 2-deoxy-2-fluoro glycosides and quinone methide have been employed to design covalent inhibitors of glycosidases [85]. Fucopyranose-configured cyclophellitol aziridines have been applied for *in vitro* and *in vivo* labelling of bacterial and mammal GH29 fucosidases [86]. More recently, a 2-deoxyl-fluoro fucosyl fluoride derivative named YL209 has been developed to match the versatile linkage specificity of GH29 enzymes, potentially extending its application to the identification of gut microbial fucosidases [87]. Lately, an ortho-quinone methide based probe with an azide mini-tag has been developed to label both retaining and inverting bacterial fucosidases [88].

## Biotechnological applications of microbial fucosidases

With the development of glycan analytical tools, glycan profiling has gained momentum in the last decade as a potential strategy to monitor the state of diseases [89]. Some of the main glycan biomarker targets are human serum N-glycans containing two types of fucosylation, antennary Le<sup>X</sup> or sLe<sup>X</sup> epitopes and Fuc- $\alpha$ -1,6-GlcNAc (6FN). The fucosylation pattern of human serum N-glycans are indicators of immunological responses to diseases including cancer [90], diabetes [91], and *Helicobacter pylori* infection [92]. Fucosidases with distinct substrate specificities have been employed as one of the exoglycosidases used to validate and monitor these glycan biomarkers in a number of human studies [72,93–98].

Another application of fucosidases is modulation of core fucosylation status in glycoproteins, such as antibodies, which is crucial for their functions such as antigen recognition [99]. So far, only human fucosidase FucA1 has been shown to release core fucose from intact glycoproteins albeit with low enzymatic activity [100]. No bacterial  $\alpha$ -L-fucosidase has been described with the capability to remove the core Fuc from intact glycosylated IgG. However, recent work characterised four fucosidases showing high capacity to hydrolyse  $\alpha$ -1,6-linked Fuc from the disaccharide 6FN [51]. These  $\alpha$ -L-fucosidases might have applications in the development of therapeutic proteins with modified core fucosylation, although their capacity to act on core fucosylation in glycosylated antibodies needs further analysis. Recent glycosidase and glycoligase tools based on the site-specific GH29 core  $\alpha$ -1,6-L-fucosidase AlfC from *L. casei*, have been developed to aid glycoengineering of antibodies for core fucosylation of the Fab and Fc fragments [23,101,102].

GH29 fucosidases also show potential for the enzymatic synthesis of valuable oligosaccharides (Figure 3) through transfucosylation including fucosylated HMOs [103] and antibody glycans [101], as recently reviewed [60,61]. For example,  $\alpha$ -L-fucosidases AlfB and AlfC from *L. casei* were used to synthesise fucosyl- $\alpha$ -1,3-N-GlcNAc, 6FN, the glycoamino acid fucosyl- $\alpha$ -1,6-N-GlcNAc-Asn, and several 6'-fucosyl-glycans [104,105]. Fucosyl-N-GlcNAc disaccharides have also been recently produced using the tran glycosylation activity of  $\alpha$ -L-fucosidases isolated from *B. fragilis* [56]. The HMOs, 2'FL, 3-fucosyllactose (3FL), and lacto-N-fucopentaose II (LNFP-II) have been synthesised in low amounts using the transfucosylation activity of  $\alpha$ -L-fucosidases isolated from *Thermotoga maritima*,

*Clostridium perfringens*, and a soil-derived metagenome library [74,106]. A GH95 fucosidase Afca from *B. bifidum* JCM 1254 has also been engineered to perform the reverse reaction by site-directed mutagenesis with the N423H mutant acting as a fucosynthase [107,108], although this approach so far is limited to  $\alpha$ -1,2-oligosaccharide synthesis.

## Conclusions and perspectives

Fucosylated glycans influence a wide range of biological processes in health and diseases. Despite recent advances in the structure and function relationships of GH29 enzymes, our biochemical and structural understanding of the range of microbial  $\alpha$ -L-fucosidases and of their natural substrates remains limited compared to the wealth of sequencing data available in metagenomic databases. Further enzymatic investigations of bacterial fucosidases should shed light on the type of fucosylated structures accessible to microbes and the specificity of  $\alpha$ -L-fucosidases towards substrates with different modifications and linkages. A combination of metagenomics and glycomics approaches is warranted to advance our knowledge into the biological roles of microbial  $\alpha$ -L-fucosidases. Harnessing the diversity of microbial  $\alpha$ -L-fucosidases will provide powerful tools that can be exploited for glycan analysis, biomarker detection or new glycan-targeted therapies.

## Summary

- Microbial  $\alpha$ -L-fucosidases from soil, marine or gut origin are of great biological and biotechnological importance.
- Enzymatic investigations of GH29  $\alpha$ -L-fucosidases advanced our knowledge of the range of substrates and glycan utilisation strategies used by microbes to adapt to their environment while  $\alpha$ -L-fucosidases from other GH families have been under-studied.
- $\alpha$ -L-Fucosidases have been developed as glycoenzyme tools for glycan analysis, biomarkers for diagnosis or glycan-targeted therapies as well as oligosaccharide synthesis and glycoengineering on glycoproteins.
- Further biochemical and structural characterisation of the variety of  $\alpha$ -L-fucosidases produced by microbes is required to enhance our understanding of the mechanisms underpinning host–microbe interactions and harness the potential of these enzymes for biotechnological and biomedical applications.

## Competing Interests

The authors declare that there are no competing interests associated with the manuscript.

## Funding

N.J. gratefully acknowledges the support of the Biotechnology and Biological Sciences Research Council (BBSRC) Institute Strategic Programme Grant Gut Microbes and Health [grant number BB/R012490/1]. H.W. was supported by fund from Guangdong Basic and Applied Basic Research Foundation [grant number 2022A1515110917].

## Open Access

Open access for this article was enabled by the participation of John Innes Centre in an all-inclusive *Read & Publish* agreement with Portland Press and the Biochemical Society under a transformative agreement with JISC.

## Abbreviations

2FG, Fuc $\alpha$ 1-2Gal; 2FL, 2-Fucosyllactose (Gal $\beta$ 1-4(Fuc $\alpha$ 1-2)Glc); 2'FL, 2'-Fucosyllactose ((Fuc $\alpha$ 1-2)Gal $\beta$ 1-4Glc); 3FL, 3-Fucosyllactose (Gal $\beta$ 1-4(Fuc $\alpha$ 1-3)Glc); 3FN, Fuc $\alpha$ 1,3GlcNAc; 3'FL, 3'-Fucosyllactose ((Fuc $\alpha$ 1-3)Gal $\beta$ 1-4Glc); 4FN, Fuc $\alpha$ 1,4GlcNAc; 6FN, Fuc $\alpha$ 1,6GlcNAc; ABP, activity-based probes; Araf, arabinofuranoside; Arap, arabinopyranoside; A<sub>type2 tetra</sub>, blood group antigen A tetraose type 2 (GalNAc $\alpha$ 1-3[Fuc $\alpha$ 1-2]Gal $\beta$ 1-4GlcNAc); A<sub>type2 tri</sub>, blood group antigen A triose type 2 (GalNAc $\alpha$ 1-3[Fuc $\alpha$ 1-2]Gal); B<sub>type2 tetra</sub>, blood group antigen B tetraose type 2 (Gal $\alpha$ 1-3[Fuc $\alpha$ 1-2]Gal $\beta$ 1-4GlcNAc); B<sub>type2 tri</sub>, blood group antigen B triose type 2 (Gal1-3[Fuc $\alpha$ 1-2]Gal); CAZY, carbohydrate active enzymes; CNP-Fuc,

2-chloro-4-nitrophenyl  $\alpha$ -L-fucose; Fuc,  $\alpha$ -L-fucose (6-deoxyl-L-galactose); Gal,  $\beta$ -Galactose; GH, glycoside hydrolase; Glc,  $\beta$ -Glucose; GlcNAc,  $\beta$ -N-acetylglucosamine; HMO, human milk oligosaccharide; H<sub>type1</sub>, blood group antigen H triose type 1 (Fuc $\alpha$ 1-2)Gal $\beta$ 1-3GlcNAc; H<sub>type2</sub>, blood group antigen H triose type 2 (Fuc $\alpha$ 1-2)Gal $\beta$ 1-4GlcNAc; H<sub>type4</sub>, blood group antigen H tetraose type 4 (Fuc $\alpha$ 1-2)Gal $\beta$ 1-3GalNAc $\beta$ 1-3Gal; Lac, lactose; LacNAc, N-acetyllactosamine; Le<sup>A</sup>, lewis A antigen triose; Le<sup>B</sup>, lewis B antigen tetraose (Fuc $\alpha$ 1-2Gal $\beta$ 1-3[Fuc $\alpha$ 1-4]GlcNAc); Le<sup>X</sup>, lewis X antigen triose; Le<sup>Y</sup>, lewis Y antigen tetraose (Fuc $\alpha$ 1-2Gal $\beta$ 1-4[Fuc $\alpha$ 1-3]GlcNAc); LNFP-I, lacto-N-fucopentaose I; LNFP-II, lacto-N-fucopentaose II; LNFP-III, lacto-N-fucopentaose III; Man, mannopyranoside; PGM, porcine gastric mucin; pNP-Fuc, *p*-nitrophenol-fucosylpyranose; RG-I, rhamnogalacturonan I; RG-II, rhamnogalacturonan II; Rha, rhamopyranose; sLe<sup>X</sup>, sialyl lewis X antigen tetraose.

## References

- Flowers, H.M. (1981) Chemistry and biochemistry of D- and L-fucose. *Adv. Carbohydr. Chem. Biochem.* **39**, 279–345, [https://doi.org/10.1016/S0065-2318\(08\)60208-5](https://doi.org/10.1016/S0065-2318(08)60208-5)
- Sutherland, I.W. (1971) Enzymic hydrolysis of colanic acid. *Eur. J. Biochem.* **23**, 582–587, <https://doi.org/10.1111/j.1432-1033.1971.tb01657.x>
- Maverakis, E., Kim, K., Shimoda, M., Gershwin, M.E., Patel, F., Wilken, R. et al. (2015) Glycans in the immune system and the altered glycan theory of autoimmunity: a critical review. *J. Autoimmun.* **57**, 1–13, <https://doi.org/10.1016/j.jaut.2014.12.002>
- Becker, D.J. and Lowe, J.B. (2003) Fucose: Biosynthesis and biological function in mammals. *Glycobiology* **13**, 41R–53R, <https://doi.org/10.1093/glycob/cwg054>
- Schneider, M., Al-Shareffi, E. and Haltiwanger, R.S. (2017) Biological functions of fucose in mammals. *Glycobiology* **27**, 601–618, <https://doi.org/10.1093/glycob/cwx034>
- Strasser, R. (2022) Recent developments in deciphering the biological role of plant complex N-glycans. *Front. Plant Sci.* **13**, 1–8, <https://doi.org/10.3389/fpls.2022.897549>
- Zhang, L., Paasch, B.C., Chen, J., Day, B. and He, S.Y. (2019) An important role of l-fucose biosynthesis and protein fucosylation genes in Arabidopsis immunity. *New Phytol.* **222**, 981–994, <https://doi.org/10.1111/nph.15639>
- Garber, J.M., Hennet, T. and Szymanski, C.M. (2021) Significance of fucose in intestinal health and disease. *Mol. Microbiol.* **115**, 1086–1093, <https://doi.org/10.1111/mmi.14681>
- Dwivedi, R., Nothhaft, H., Garber, J., Xin Kin, L., Stahl, M., Flint, A. et al. (2016) L-fucose influences chemotaxis and biofilm formation in *Campylobacter jejuni*. *Mol. Microbiol.* **101**, 575–589, <https://doi.org/10.1111/mmi.13409>
- Li, J., Chen, J., Wang, L., Lin, Y., Zhang, X., Liu, J. et al. (2022) Characterization of the response of *Escherichia coli* to l-fucose in bacterial swimming motility. *J. Basic Microbiol.* **62**, 584–592, <https://doi.org/10.1002/jobm.202200054>
- Pacheco, A.R., Munera, D., Waldor, M.K., Sperandio, V. and Ritchie, J.M. (2012) Fucose sensing regulates bacterial intestinal colonization. *Nature* **492**, 113–117, <https://doi.org/10.1038/nature11623>
- Garber, J.M., Nothhaft, H., Pluvinaige, B., Stahl, M., Bian, X., Porfirio, S. et al. (2020) The gastrointestinal pathogen *Campylobacter jejuni* metabolizes sugars with potential help from commensal *Bacteroides vulgatus*. *Commun. Biol.* **3**, 1–11, <https://doi.org/10.1038/s42003-019-0727-5>
- Crost, E.H., Tailford, L.E., Le Gall, G., Fons, M., Henrissat, B. and Juge, N. (2013) Utilisation of mucin glycans by the human gut symbiont *Ruminococcus gnavus* is strain-dependent. *PLoS ONE* **8**, e76341, <https://doi.org/10.1371/journal.pone.0076341>
- Tailford, L.E., Crost, E.H., Kavanaugh, D. and Juge, N. (2015) Mucin glycan foraging in the human gut microbiome. *Front. Genet.* **6**, 1–18, <https://doi.org/10.3389/fgene.2015.00081>
- Staudacher, E., Altmann, F., Wilson, I.B.H. and März, L. (1999) Fucose in N-glycans: From plant to man. *Biochim. Biophys. Acta - Gen. Subj.* **1473**, 216–236, [https://doi.org/10.1016/S0304-4165\(99\)00181-6](https://doi.org/10.1016/S0304-4165(99)00181-6)
- Ma, B., Simala-Grant, J.L. and Taylor, D.E. (2006) Fucosylation in prokaryotes and eukaryotes. *Glycobiology* **16**, 158R–184R, <https://doi.org/10.1093/glycob/cwl040>
- Kizuka, Y. (2022) Metabolic utilization and remodeling of glycan biosynthesis using fucose analogs. *Biochim. Biophys. Acta - Gen. Subj.* **1866**, 130243, <https://doi.org/10.1016/j.bbagen.2022.130243>
- Orczyk-Pawilowicz, M. and Lis-Kuberka, J. (2020) The impact of dietary fucosylated oligosaccharides and glycoproteins of human milk on infant well-being. *Nutrients* **12**, 1105, <https://doi.org/10.3390/nu12041105>
- Yamashita, K., Tachibana, Y. and Kobata, A. (1976) Oligosaccharides of human milk. Isolation and characterization of three new disialylfucosyl hexasaccharides. *Arch. Biochem. Biophys.* **174**, 582–591, [https://doi.org/10.1016/0003-9861\(76\)90387-8](https://doi.org/10.1016/0003-9861(76)90387-8)
- Nakano, M., Kakehi, K., Tsai, M.H. and Lee, Y.C. (2004) Detailed structural features of glycan chains derived from  $\alpha$ 1-acid glycoproteins of several different animals: The presence of hypersialylated, O-acetylated sialic acids but not disialyl1 residues. *Glycobiology* **14**, 431–441, <https://doi.org/10.1093/glycob/cwh034>
- Wuhrer, M., Balog, C.I.A., Koeleman, C.A.M., Deelder, A.M. and Hokke, C.H. (2005) New features of site-specific horseradish peroxidase (HRP) glycosylation uncovered by nano-LC-MS with repeated ion-isolation/fragmentation cycles. *Biochim. Biophys. Acta - Gen. Subj.* **1723**, 229–239, <https://doi.org/10.1016/j.bbagen.2005.02.013>
- Seismann, H., Blank, S., Braren, I., Greunke, K., Cifuentes, L., Grunwald, T. et al. (2010) Dissecting cross-reactivity in hymenoptera venom allergy by circumvention of  $\alpha$ -1,3-core fucosylation. *Mol. Immunol.* **47**, 799–808, <https://doi.org/10.1016/j.molimm.2009.10.005>
- Klontz, E.H., Li, C., Kihn, K., Fields, J.K., Beckett, D., Snyder, G.A. et al. (2020) Structure and dynamics of an  $\alpha$ -fucosidase reveal a mechanism for highly efficient IgG transfucosylation. *Nat. Commun.* **11**, 1–14, <https://doi.org/10.1038/s41467-020-20044-z>
- Höti, N., Yang, S., Hu, Y., Shah, P., Haffner, M.C. and Zhang, H. (2018) Overexpression of  $\alpha$  [1,6] fucosyltransferase in the development of castration-resistant prostate cancer cells. *Prostate Cancer Prostatic Dis.* **21**, 137–146, <https://doi.org/10.1038/s41391-017-0016-7>



- 25 Dion, M., Fourage, L., Hallet, J.N. and Colas, B. (1999) Cloning and expression of a  $\beta$ -glycosidase gene from *Thermus thermophilus*. Sequence and biochemical characterization of the encoded enzyme. *Glycoconj. J.* **16**, 27–37, <https://doi.org/10.1023/A:1006997602727>
- 26 Yoshida, S., Park, D.S., Bae, B., MacKie, R., Cann, I.K.O. and Nair, S.K. (2011) Structural and functional analyses of a glycoside hydrolase family 5 enzyme with an unexpected  $\beta$ -fucosidase activity. *Biochemistry* **50**, 3369–3375, <https://doi.org/10.1021/bi200222u>
- 27 Kovařová, T., Bene, E., Lipovová, P. and Dohnálek, J. (2019) Active site complementation and hexameric arrangement in the GH family 29; a structure-function study of  $\alpha$ -L-fucosidase isoenzyme 1 from *Paenibacillus thiaminolyticus*. *Glycobiology* **29**, 59–73
- 28 van Bueren, A.L., Arde, A., Fayers-Kerr, J., Luo, B., Zhang, Y., Sollogoub, M. et al. (2010) Analysis of the reaction coordinate of alpha-L-fucosidases: a combined structural and quantum mechanical approach. *J. Am. Chem. Soc.* **132**, 1804–1806, <https://doi.org/10.1021/ja908908g>
- 29 Guillotin, L., Lafite, P. and Daniellou, R. (2014) Unraveling the substrate recognition mechanism and specificity of the unusual glycosyl hydrolase family 29 BT2192 from *Bacteroides thetaiotaomicron*. *Biochemistry* **53**, 1447–1455, <https://doi.org/10.1021/bi400951q>
- 30 Sulzenbacher, G., Bignon, C., Nishimura, T., Tarling, C.A., Withers, S.G., Henrissat, B. et al. (2004) Crystal structure of *Thermotoga maritima*  $\alpha$ -L-fucosidase: Insights into the catalytic mechanism and the molecular basis for fucosidosis. *J. Biol. Chem.* **279**, 13119–13128, <https://doi.org/10.1074/jbc.M313783200>
- 31 Sakurama, H., Fushinobu, S., Hidaka, M., Yoshida, E., Honda, Y., Ashida, H. et al. (2012) 1,3-1,4- $\alpha$ -L-Fucosynthase that specifically introduces Lewis a/x antigens into type-1/2 chains. *J. Biol. Chem.* **287**, 16709–16719, <https://doi.org/10.1074/jbc.M111.333781>
- 32 Dong, S., Chang, Y., Shen, J., Xue, C. and Chen, F. (2017) Purification, expression and characterization of a novel  $\alpha$ -L-fucosidase from a marine bacteria *Wenyngzhuangia fucanilytica*. *Protein Expr. Purif.* **129**, 9–17, <https://doi.org/10.1016/j.pep.2016.08.016>
- 33 Wu, H., Rebello, O., Crost, E.H., Owen, C.D., Walpole, S., Bennati-Granier, C. et al. (2021) Fucosidases from the human gut symbiont *Ruminococcus gnavus*. *Cell. Mol. Life Sci.* **78**, 675–693, <https://doi.org/10.1007/s00018-020-03514-x>
- 34 Hobbs, J.K., Pluvinage, B., Robb, M., Smith, S.P. and Boraston, A.B. (2019) Two complementary  $\alpha$ -fucosidases from *Streptococcus pneumoniae* promote complete degradation of host-derived carbohydrate antigens. *J. Biol. Chem.* **294**, 12670–12682, <https://doi.org/10.1074/jbc.RA119.009368>
- 35 Cao, H., Walton, J.D., Brumm, P. and Phillips, G.N. (2014) Structure and substrate specificity of a eukaryotic fucosidase from *Fusarium graminearum*. *J. Biol. Chem.* **289**, 25624–25638, <https://doi.org/10.1074/jbc.M114.583286>
- 36 Summers, E.L., Moon, C.D., Atua, R. and Arcus, V.L. (2016) The structure of a glycoside hydrolase 29 family member from a rumen bacterium reveals unique, dual carbohydrate-binding domains. *Acta Crystallogr. Sect. Struct. Biol. Commun.* **72**, 750–761, <https://doi.org/10.1107/S2053230X16014072>
- 37 Hong, H., Kim, D.H., Seo, H., Kim, K.J.K.H.K.J. and Kim, K.J.K.H.K.J. (2021) Dual  $\alpha$ -1,4- and  $\beta$ -1,4-Glycosidase Activities by the Novel Carbohydrate-Binding Module in  $\alpha$ -L-Fucosidase from *Vibrio* sp. Strain EJV3. *J. Agric. Food Chem.* **69**, 3380–3389, <https://doi.org/10.1021/acs.jafc.0c08199>
- 38 Robb, C.S., Hobbs, J.K., Pluvinage, B., Reintjes, G., Klassen, L., Monteith, S. et al. (2022) Metabolism of a hybrid algal galactan by members of the human gut microbiome. *Nat. Chem. Biol.* **18**, 501–510, <https://doi.org/10.1038/s41589-022-00983-y>
- 39 Nagae, M., Tsuchiya, A., Katayama, T., Yamamoto, K., Wakatsuki, S. and Kato, R. (2007) Structural basis of the catalytic reaction mechanism of novel 1,2- $\alpha$ -L-fucosidase from *Bifidobacterium bifidum*. *J. Biol. Chem.* **282**, 18497–18509, <https://doi.org/10.1074/jbc.M702246200>
- 40 Rogowski, A., Briggs, J.A., Mortimer, J.C., Tryfona, T., Terrapon, N., Lowe, E.C. et al. (2015) Glycan complexity dictates microbial resource allocation in the large intestine. *Nat. Commun.* **6**, 7481, <https://doi.org/10.1038/ncomms8481>
- 41 Vieira, P.S., Bonfim, I.M., Araujo, E.A., Melo, R.R., Lima, A.R., Fessel, M.R. et al. (2021) Xyloglucan processing machinery in *Xanthomonas* pathogens and its role in the transcriptional activation of virulence factors. *Nat. Commun.* **12**, 1–15, <https://doi.org/10.1038/s41467-021-24277-4>
- 42 Ndeh, D., Rogowski, A., Cartmell, A., Luis, A.S., Baslé, A., Gray, J. et al. (2017) Complex pectin metabolism by gut bacteria reveals novel catalytic functions. *Nature* **544**, 65–70, <https://doi.org/10.1038/nature21725>
- 43 Kovařová, T., Kovař, T., Stránský, J., Kolenko, P., Dušková, J., Švecová, L. et al. (2022) The first structure-function study of GH151  $\alpha$ -L-fucosidase uncovers new oligomerization pattern, active site complementation, and selective substrate specificity. *FEBS J.* **289**, 4998–5020, <https://doi.org/10.1111/febs.16387>
- 44 You, J., Lin, S. and Jiang, T. (2019) Origins and evolution of the  $\alpha$ -L-fucosidases: from bacteria to metazoans. *Front. Microbiol.* **10**, 1–9, <https://doi.org/10.3389/fmicb.2019.01756>
- 45 Drula, E., Garron, M.L., Dogan, S., Lombard, V., Henrissat, B. and Terrapon, N. (2022) The carbohydrate-active enzyme database: functions and literature. *Nucleic Acids Res.* **50**, D571–D577, <https://doi.org/10.1093/nar/gkab1045>
- 46 Silchenko, A.S., Rubtsov, N.K., Zueva, A.O., Kusaykin, M.I., Rasin, A.B. and Ermakova, S.P. (2022) Fucoidan-active  $\alpha$ -L-fucosidases of the GH29 and GH95 families from a fucoidan degrading cluster of the marine bacterium *Wenyngzhuangia fucanilytica*. *Arch. Biochem. Biophys.* **728**, 109373, <https://doi.org/10.1016/j.abb.2022.109373>
- 47 Sakurama, H., Tsutsumi, E., Ashida, H., Katayama, T., Yamamoto, K. and Kumagai, H. (2012) Differences in the Substrate Specificities and Active-Site Structures of Two  $\alpha$ -L-Fucosidases (Glycoside Hydrolase Family 29) from *Bacteroides thetaiotaomicron*. *Biosci. Biotechnol. Biochem.* **76**, 1022–1024, <https://doi.org/10.1271/bbb.111004>
- 48 Ashida, H., Miyake, A., Kiyohara, M., Wada, J., Yoshida, E., Kumagai, H. et al. (2009) Two distinct  $\alpha$ -L-fucosidases from *Bifidobacterium bifidum* are essential for the utilization of fucosylated milk oligosaccharides and glycoconjugates. *Glycobiology* **19**, 1010–1017, <https://doi.org/10.1093/glycob/cwp082>
- 49 Fan, S., Zhang, H., Chen, X., Lu, L., Xu, L. and Xiao, M. (2016) Cloning, characterization, and production of three  $\alpha$ -L-fucosidases from *Clostridium perfringens* ATCC 13124. *J. Basic Microbiol.* **56**, 347–357, <https://doi.org/10.1002/jbom.201500582>
- 50 Grootaert, H., van Landuyt, L., Hulpiau, P. and Callewaert, N. (2020) Functional exploration of the GH29 fucosidase family. *Glycobiology* **00**, 1–11

- 51 Moya-González, E.M., Peña-Gil, N., Rubio-del-Campo, A., Coll-Marqués, J.M., Gozalbo-Rovira, R., Monedero, V. et al. (2022) Infant gut microbial metagenome mining of  $\alpha$ -L-fucosidases with activity on fucosylated human milk oligosaccharides and glycoconjugates. *Microbiol. Spectr.* **10**, e0177522, <https://doi.org/10.1128/spectrum.01775-22>
- 52 Shishiuchi, R., Kang, H., Tagami, T., Ueda, Y., Lang, W., Kimura, A. et al. (2022) Discovery of  $\alpha$ -L-glucosidase raises the possibility of  $\alpha$ -L-glucosides in nature. *ACS Omega* **7**, 47411–47423, <https://doi.org/10.1021/acsomega.2c06991>
- 53 Shaikh, F.A., Lammerts Van Bueren, A., Davies, G.J. and Withers, S.G. (2013) Identifying the catalytic acid/base in GH29  $\alpha$ -L-fucosidase subfamilies. *Biochemistry* **52**, 5857–5864, <https://doi.org/10.1021/bi400183q>
- 54 Ashida, H., Fujimoto, T., Kurihara, S., Nakamura, M., Komeno, M., Huang, Y. et al. (2020) 1,6- $\alpha$ -L-Fucosidases from *Bifidobacterium longum* subsp. *infantis* ATCC 15697 Involved in the Degradation of Core-fucosylated N-Glycan. *J. Appl. Glycosci.* **67**, 23–29, <https://doi.org/10.5458/jag.jag.JAG-20190016>
- 55 Li, T., Li, M., Hou, L., Guo, Y., Wang, L., Sun, G. et al. (2018) Identification and characterization of a core fucosidase from the bacterium *Elizabethkingia meningoseptica*. *J. Biol. Chem.* **293**, 1243–1258, <https://doi.org/10.1074/jbc.M117.804252>
- 56 Liu, P., Zhang, H., Wang, Y., Chen, X., Jin, L., Xu, L. et al. (2020) Screening and characterization of an  $\alpha$ -L-fucosidase from *Bacteroides fragilis* NCTC9343 for synthesis of fucosyl-N-acetylglucosamine disaccharides. *Appl. Microbiol. Biotechnol.* **104**, 7827–7840, <https://doi.org/10.1007/s00253-020-10759-w>
- 57 Schultz-Johansen, M., Stougaard, P., Svensson, B. and Teze, D. (2022) Characterization of five marine family 29 glycoside hydrolases reveals an  $\alpha$ -L-fucosidase targeting specifically Fuc( $\alpha$ 1,4)GlcNAc. *Glycobiology* **32**, 529–539, <https://doi.org/10.1093/glycob/cwab132>
- 58 Wong-madden, S.T. and Landry, D. (1995) Purification and characterization of novel glycosidases from the bacterial genus *Xanthomonas*. *Glycobiology* **5**, 19–28, <https://doi.org/10.1093/glycob/5.1.19>
- 59 Klamer, Z., Staal, B., Prudden, A.R., Liu, L., Smith, D.F., Boons, G. et al. (2017) Mining high-complexity motifs in glycans: a new language to uncover the fine specificities of lectins and glycosidases. *Anal. Chem.* **89**, 12342–12350, <https://doi.org/10.1021/acs.analchem.7b04293>
- 60 Wan, L., Zhu, Y., Zhang, W. and Mu, W. (2020)  $\alpha$ -L-Fucosidases and their applications for the production of fucosylated human milk oligosaccharides. *Appl. Microbiol. Biotechnol.* **104**, 5619–5631, <https://doi.org/10.1007/s00253-020-10635-7>
- 61 Zeuner, B. and Meyer, A.S. (2020) Enzymatic transfucosylation for synthesis of human milk oligosaccharides. *Carbohydr. Res.* **493**, 108029, <https://doi.org/10.1016/j.carres.2020.108029>
- 62 Déjean, G., Tauzin, A.S., Bennett, S.W., Creagh, A.L. and Brumer, H. (2019) Adaptation of syntenic xyloglucan utilization loci of human gut *Bacteroidetes* to polysaccharide side chain diversity. *Appl. Environ. Microbiol.* **85**, 1–17, <https://doi.org/10.1128/AEM.01491-19>
- 63 Sela, D.A., Garrido, D., Lerno, L., Wu, S., Tan, K., Eom, H.J. et al. (2012) *Bifidobacterium longum* subsp. *infantis* ATCC 15697  $\alpha$ -fucosidases are active on fucosylated human milk oligosaccharides. *Appl. Environ. Microbiol.* **78**, 795–803, <https://doi.org/10.1128/AEM.06762-11>
- 64 Larsbrink, J., Thompson, A.J., Lundqvist, M., Gardner, J.G., Davies, G.J. and Brumer, H. (2014) A complex gene locus enables xyloglucan utilization in the model saprophyte *Cellvibrio japonicus*. *Mol. Microbiol.* **94**, 418–433, <https://doi.org/10.1111/mmi.12776>
- 65 Katayama, T., Fujita, K. and Yamamoto, K. (2005) Novel bifidobacterial glycosidases acting on sugar chains of mucin glycoproteins. *J. Biosci. Bioeng.* **99**, 457–465, <https://doi.org/10.1263/jbb.99.457>
- 66 Léonard, R., Pabst, M., Bondili, J.S., Chambat, G., Veit, C., Strasser, R. et al. (2008) Identification of an Arabidopsis gene encoding a GH95  $\alpha$ 1,2-fucosidase active on xyloglucan oligo- and polysaccharides. *Phytochemistry* **69**, 1983–1988, <https://doi.org/10.1016/j.phytochem.2008.03.024>
- 67 Ishimizu, T., Hashimoto, C., Takeda, R., Fujii, K. and Hase, S. (2007) A novel  $\alpha$ 1,2-L-fucosidase acting on xyloglucan oligosaccharides is associated with endo- $\beta$ -mannosidase. *J. Biochem.* **142**, 721–729, <https://doi.org/10.1093/jb/mvm186>
- 68 Li, Q., Jiang, C., Tan, H., Zhao, X., Li, K. and Yin, H. (2021) Characterization of recombinant *E. coli* expressing a novel fucosidase from *Bacillus cereus* 2-8 belonging to GH95 family. *Protein Expr. Purif.* **186**, 105897, <https://doi.org/10.1016/j.pep.2021.105897>
- 69 Bauer, S., Vasu, P., Persson, S., Mort, A.J. and Somerville, C.R. (2006) Development and application of a suite of polysaccharide-degrading enzymes for analyzing plant cell walls. *Proc. Natl. Acad. Sci. U.S.A.* **103**, 11417–11422, <https://doi.org/10.1073/pnas.0604632103>
- 70 Garrido, D., Ruiz-Moyano, S., Kirmiz, N., Davis, J.C., Totten, S.M., Lemay, D.G. et al. (2016) A novel gene cluster allows preferential utilization of fucosylated milk oligosaccharides in *Bifidobacterium longum* subsp. *longum* SC596. *Sci. Rep.* **6**, 35045, <https://doi.org/10.1038/srep35045>
- 71 Shani, G., Hoeflinger, J.L., Heiss, B.E., Masarweh, C.F., Larke, J.A., Jensen, N.M. et al. (2022) Fucosylated Human Milk Oligosaccharide Foraging within the Species *Bifidobacterium pseudocatenulatum* Is Driven by Glycosyl Hydrolase Content and Specificity. *Appl. Environ. Microbiol.* **88**, 1–18, <https://doi.org/10.1128/AEM.01707-21>
- 72 Heinze, S., Mechelke, M., Kornberger, P., Liebl, W., Schwarz, W.H. and Zverlov, V.V. (2017) Identification of endoxylanase XynE from *Clostridium thermocellum* as the first xylanase of glycoside hydrolase family GH141. *Sci. Rep.* **7**, 1–10, <https://doi.org/10.1038/s41598-017-11598-y>
- 73 Benešová, E., Lipová, P., Krejzová, J., Kovalová, T., Buchtová, P., Spiwok, V. et al. (2015) Alpha-L-Fucosidase Isoenzyme iso2 from *Paenibacillus thiaminolyticus*. *BMC Biotechnol.* **15**, 1–7, <https://doi.org/10.1186/s12896-015-0160-x>
- 74 Lezyk, M., Jers, C., Kjaerulf, L., Gottfredsen, C.H., Mikkelsen, M.D. and Mikkelsen, J.D. (2016) Novel  $\alpha$ -L-fucosidases from a soil metagenome for production of fucosylated human milk oligosaccharides. *PLoS ONE* **11**, e0147438, <https://doi.org/10.1371/journal.pone.0147438>
- 75 Kostopoulos, I., Elzinga, J., Ottman, N., Klievink, J.T., Blijenberg, B., Aalvink, S. et al. (2020) *Akkermansia muciniphila* uses human milk oligosaccharides to thrive in the early life conditions in vitro. *Sci. Rep.* **10**, 1–17, <https://doi.org/10.1038/s41598-020-71113-8>
- 76 Pickard, J.M., Maurice, C.F., Kinnebrew, M.A., Abt, M.C., Schenten, D., Golovkina, T.V. et al. (2014) Rapid fucosylation of intestinal epithelium sustains host-commensal symbiosis in sickness. *Nature* **514**, 638–641, <https://doi.org/10.1038/nature13823>
- 77 Lei, C., Sun, R., Xu, G., Tan, Y., Feng, W., McClain, C.J. et al. (2022) Enteric VIP-producing neurons maintain gut microbiota homeostasis through regulating epithelium fucosylation. *Cell Host Microbe* **30**, 1417–1434.e8, <https://doi.org/10.1016/j.chom.2022.09.001>

- 78 Horigome, A., Hashikura, N., Yoshida, K., Xiao, J. and Odamaki, T. (2022) 2'-Fucosyllactose increases the abundance of blautia in the presence of extracellular fucosidase-possessing bacteria. *Front. Microbiol.* **13**, 913624, <https://doi.org/10.3389/fmicb.2022.913624>
- 79 Shuoker, B., Pichler, M.J., Jin, C., Hiroka, S., Wu, H., Gascuña, A.M. et al. (2022) Sialidases and Fucosidases of Akkermansia muciniphila are crucial for growth on mucin and nutrient sharing with mucus-associated gut bacteria. *bioRxiv*, <https://doi.org/10.1101/2022.09.10.507281>
- 80 Ng, K.M., Ferreyra, J.A., Higginbottom, S.K., Lynch, J.B., Kashyap, P.C., Gopinath, S. et al. (2013) Microbiota-liberated host sugars facilitate post-antibiotic expansion of enteric pathogens. *Nature* **502**, 96–99, <https://doi.org/10.1038/nature12503>
- 81 Stahl, M., Friis, L.M., Nothhaft, H., Liu, X., Li, J., Szymanski, C.M. et al. (2011) L-fucose utilization provides *Campylobacter jejuni* with a competitive advantage. *Proc. Natl. Acad. Sci. U.S.A.* **108**, 7194–7199, <https://doi.org/10.1073/pnas.1014125108>
- 82 Luijckx, Y.M.C.A., Bleumink, N.M.C., Jiang, J., Overkleef, H.S., Wösten, M.M.S.M., Strijbis, K. et al. (2020) *Bacteroides fragilis* fucosidases facilitate growth and invasion of *Campylobacter jejuni* in the presence of mucins. *Cell. Microbiol.* **22**, 1–12, <https://doi.org/10.1111/cmi.13252>
- 83 Sorbara, M.T. and Pamer, E.G. (2019) Interbacterial mechanisms of colonization resistance and the strategies pathogens use to overcome them. *Mucosal. Immunol.* **12**, 1–9, <https://doi.org/10.1038/s41385-018-0053-0>
- 84 Nandakumar, M., Hsu, Y.L., Lin, J.C.Y., Lo, C., Lo, L.C. and Lin, C.H. (2015) Detection of human  $\alpha$ -L-fucosidases by a quinone methide-generating probe: enhanced activities in response to *Helicobacter pylori* infection. *Chem. Bio. Chem.* **16**, 1555–1559, <https://doi.org/10.1002/cbic.201500178>
- 85 Rempel, B.P. and Withers, S.G. (2008) Covalent inhibitors of glycosidases and their applications in biochemistry and biology. *Glycobiology* **18**, 570–586, <https://doi.org/10.1093/glycob/cwn041>
- 86 Jiang, J., Kallemeijn, W.W., Wright, D.W., Van Den Nieuwendijk, A.M.C.H., Rohde, V.C., Folch, E.C. et al. (2015) In Vitro and in vivo comparative and competitive activity-based protein profiling of GH29  $\alpha$ -L-fucosidases. *Chem. Sci.* **6**, 2782–2789, <https://doi.org/10.1039/C4SC03739A>
- 87 Luijckx, Y.M.C.A., Jongkees, S., Strijbis, K. and Wennekes, T. (2021) Development of a 1,2-difluorofucoside activity-based probe for profiling GH29 fucosidases. *Org. Biomol. Chem.* **19**, 2968–2977, <https://doi.org/10.1039/D1OB00054C>
- 88 Luijckx, Y.M.C.A., Henselijn, A.J., Bosman, G.P., Cramer, D.A.T., Giesbers, K.C.A.P., van Veld, E.M. et al. (2022) Detection of bacterial  $\alpha$ -L-fucosidases with an ortho-quinone methide-based probe and mapping of the probe-protein adducts. *Molecules* **27**, 1615, <https://doi.org/10.3390/molecules27051615>
- 89 Mitra, I., Snyder, C.M., Zhou, X., Campos, M.I., Alley, W.R., Novotny, M.V. et al. (2016) Structural characterization of serum N-glycans by methylation, fluorescent labeling, and analysis by microchip electrophoresis. *Anal. Chem.* **88**, 8965–8971, <https://doi.org/10.1021/acs.analchem.6b00882>
- 90 Pinho, S.S. and Reis, C.A. (2015) Glycosylation in cancer: mechanisms and clinical implications. *Nat. Rev. Cancer* **15**, 540–555, <https://doi.org/10.1038/nrc3982>
- 91 Thanabalasingham, G., Huffman, J.E., Kattla, J.J., Novokmet, M., Rudan, I., Gloyd, A.L. et al. (2013) Mutations in HNF1A result in marked alterations of plasma glycan profile. *Diabetes* **62**, 1329–1337, <https://doi.org/10.2337/db12-0880>
- 92 Liu, T.W., Ho, C.W., Huang, H.H., Chang, S.M., Popat, S.D., Wang, Y.T. et al. (2009) Role for  $\alpha$ -L-fucosidase in the control of *Helicobacter pylori*-infected gastric cancer cells. *Proc. Natl. Acad. Sci. U.S.A.* **106**, 14581–14586, <https://doi.org/10.1073/pnas.0903286106>
- 93 Liquori, G.E., Mastrodonato, M., Mentino, D., Scillitani, G., Desantis, S., Portincasa, P. et al. (2012) In situ characterization of O-linked glycans of Muc2 in mouse colon. *Acta Histochem.* **114**, 723–732, <https://doi.org/10.1016/j.acthis.2011.12.009>
- 94 Nwosu, C., Yau, H.K. and Becht, S. (2015) Assignment of core versus antenna fucosylation types in protein N-glycosylation via procainamide labeling and tandem mass spectrometry. *Anal. Chem.* **87**, 5905–5913, <https://doi.org/10.1021/ac5040743>
- 95 Demus, D., Jansen, B.C., Gardner, R.A., Urbanowicz, P.A., Wu, H., Štambuk, T. et al. (2021) Interlaboratory evaluation of plasma N-glycan antennary fucosylation as a clinical biomarker for HNF1A-MODY using liquid chromatography methods. *Glycoconj. J.* **38**, 375–386, <https://doi.org/10.1007/s10719-021-09992-w>
- 96 Demus, D., Urbanowicz, P.A., Gardner, R.A., Wu, H., Juszcak, A., Štambuk, T. et al. (2022) Development of an exoglycosidase plate-based assay for detecting  $\alpha$ 1-3,4 fucosylation biomarker in individuals with HNF1A-MODY. *Glycobiology* **32**, 230–238, <https://doi.org/10.1093/glycob/cwab107>
- 97 Rebello, O.D., Nicolardi, S., Lageveen-Kammeijer, G.S.M., Nouta, J., Gardner, R.A., Mesker, W.E. et al. (2020) A matrix-assisted laser desorption/ionization—mass spectrometry assay for the relative quantitation of antennary fucosylated N-glycans in human plasma. *Front. Chem.* **8**, 1–15, <https://doi.org/10.3389/fchem.2020.00138>
- 98 Rohrer, J.S., Basumallick, L. and Hurum, D.C. (2016) Profiling N-linked oligosaccharides from IgG by high-performance anion-exchange chromatography with pulsed amperometric detection. *Glycobiology* **26**, 582–591, <https://doi.org/10.1093/glycob/cww006>
- 99 Li, W., Yu, R., Ma, B., Yang, Y., Jiao, X., Liu, Y. et al. (2015) Core fucosylation of IgG B cell receptor is required for antigen recognition and antibody production. *J. Immunol.* **194**, 2596–2606, <https://doi.org/10.4049/jimmunol.1402678>
- 100 Prabhu, S.K., Li, C., Zong, G., Zhang, R. and Wang, L.X. (2021) Comparative studies on the substrate specificity and defucosylation activity of three  $\alpha$ -L-fucosidases using synthetic fucosylated glycopeptides and glycoproteins as substrates. *Bioorganic Med. Chem.* **42**, 116243, <https://doi.org/10.1016/j.bmc.2021.116243>
- 101 Li, C., Zhu, S., Ma, C. and Wang, L.X. (2017) Designer  $\alpha$ 1,6-fucosidase mutants enable direct core fucosylation of intact N-glycopeptides and N-glycoproteins. *J. Am. Chem. Soc.* **139**, 15074–15087, <https://doi.org/10.1021/jacs.7b07906>
- 102 Giddens, J.P., Lomino, J.V., DiLillo, D.J., Ravetch, J.V. and Wang, L.X. (2018) Site-selective chemoenzymatic glycoengineering of Fab and Fc glycans of a therapeutic antibody. *Proc. Natl. Acad. Sci. U.S.A.* **115**, 12023–12027, <https://doi.org/10.1073/pnas.1812833115>
- 103 Saumonneau, A., Champion, E., Peltier-Pain, P., Molnar-Gabor, D., Hendrickx, J., Tran, V. et al. (2015) Design of an  $\alpha$ -L-transfucosidase for the synthesis of fucosylated HMOs. *Glycobiology* **26**, 261–269, <https://doi.org/10.1093/glycob/cww099>
- 104 Becerra, J.E., Rodríguez-Díaz, J., Gozalbo-Rovira, R., Palomino-Schätzlein, M., Zúñiga, M., Monedero, V. et al. (2020) Unique microbial catabolic pathway for the human core N-glycan constituent fucosyl- $\alpha$ -1,6-N-acetylglucosamine-asparagine. *MBio* **11**, 1–18, <https://doi.org/10.1128/mBio.02804-19>

- 105 Rodríguez-Díaz, J., Carbajo, R.J., Pineda-Lucena, A., Monedero, V. and Yebra, M.J. (2013) Synthesis of fucosyl-N-acetylglucosamine disaccharides by transglucosylation using  $\alpha$ -L-Fucosidases from *Lactobacillus casei*. *Appl. Environ. Microbiol.* **79**, 3847–3850, <https://doi.org/10.1128/AEM.00229-13>
- 106 Zeuner, B., Muschiol, J., Holck, J., Lezyk, M., Gedde, M.R., Jers, C. et al. (2018) Substrate specificity and transglucosylation activity of GH29  $\alpha$ -L-fucosidases for enzymatic production of human milk oligosaccharides. *N. Biotechnol.* **41**, 34–45, <https://doi.org/10.1016/j.nbt.2017.12.002>
- 107 Sugiyama, Y., Gotoh, A., Katoh, T., Honda, Y., Yoshida, E., Kurihara, S. et al. (2016) Introduction of H-antigens into oligosaccharides and sugar chains of glycoproteins using highly efficient 1,2- $\alpha$ -L-fucosyltransferase. *Glycobiology* **26**, 1235–1247, <https://doi.org/10.1093/glycob/cww085>
- 108 Sugiyama, Y., Katoh, T., Honda, Y., Gotoh, A., Ashida, H., Kurihara, S. et al. (2017) Application study of 1,2- $\alpha$ -L-fucosyltransferase: introduction of Fuc $\alpha$ 1-2Gal disaccharide structures on N-glycan, ganglioside, and xyloglucan oligosaccharide. *Biosci. Biotechnol. Biochem.* **81**, 283–291, <https://doi.org/10.1080/09168451.2016.1254532>
- 109 Varki, A., Cummings, R.D., Aebi, M., Packer, N.H., Seeberger, P.H., Esko, J.D. et al. (2015) Symbol nomenclature for graphical representations of glycans. *Glycobiology* **25**, 1323–1324, <https://doi.org/10.1093/glycob/cww091>
- 110 Neelamegham, S., Aoki-Kinoshita, K., Bolton, E., Frank, M., Lisacek, F., Lütke, T. et al. (2019) Updates to the symbol nomenclature for glycans guidelines. *Glycobiology* **29**, 620–624, <https://doi.org/10.1093/glycob/cwz045>
- 111 Cobucci-Ponzano, B., Trincone, A., Giordano, A., Rossi, M. and Moracci, M. (2003) Identification of an archaeal  $\alpha$ -L-fucosidase encoded by an interrupted gene: Production of a functional enzyme by mutations mimicking programmed -1 frameshifting. *J. Biol. Chem.* **278**, 14622–14631, <https://doi.org/10.1074/jbc.M211834200>
- 112 Curci, N., Strazzulli, A., Iacono, R., De Lise, F., Maurelli, L., Di Fenza, M. et al. (2021) Xyloglucan oligosaccharides hydrolysis by exo-acting glycoside hydrolases from hyperthermophilic microorganism *Saccharolobus solfataricus*. *Int. J. Mol. Sci.* **22**, 3325, <https://doi.org/10.3390/ijms22073325>
- 113 Liu, S., Kulnich, A., Cai, Z.P., Ma, H.Y., Du, Y.M., Lv, Y.M. et al. (2016) The fucosidase-pool of *Emericia oligotrophica*: Biochemical characterization and transglucosylation potential. *Glycobiology* **26**, 871–879, <https://doi.org/10.1093/glycob/cww030>
- 114 Megson, Z.A., Koerdtt, A., Schuster, H., Ludwig, R., Janesch, B., Frey, A. et al. (2015) Characterization of an  $\alpha$ -L-fucosidase from the periodontal pathogen *Tannerella forsythia*. *Virulence* **6**, 282–292, <https://doi.org/10.1080/21505594.2015.1010982>
- 115 Shi, R., Ma, J., Yan, Q., Yang, S., Fan, Z. and Jiang, Z. (2020) Biochemical characterization of a novel  $\alpha$ -L-fucosidase from *Pedobacter* sp. and its application in synthesis of 3'-fucosyllactose and 2'-fucosyllactose. *Appl. Microbiol. Biotechnol.* **104**, 5813–5826, <https://doi.org/10.1007/s00253-020-10630-y>
- 116 Briliūtė, J., Urbanowicz, P.A., Luis, A.S., Baslé, A., Paterson, N., Rebello, O. et al. (2019) Complex N-glycan breakdown by gut *Bacteroides* involves an extensive enzymatic apparatus encoded by multiple co-regulated genetic loci. *Nat. Microbiol.* **4**, 1571–1581, <https://doi.org/10.1038/s41564-019-0466-x>
- 117 Dupouiron, S., Zischek, C., Ligat, L., Carbonne, J., Boulanger, A., Dugé De Bernonville, T. et al. (2015) The N-Glycan cluster from *Xanthomonas campestris* pv. *campestris*: A toolbox for sequential plant N-Glycan processing. *J. Biol. Chem.* **290**, 6022–6036, <https://doi.org/10.1074/jbc.M114.624593>
- 118 Bishnoi, R., Mahajan, S. and Ramya, T.N.C. (2018) An F-type lectin domain directs the activity of *Streptosporangium roseum*  $\alpha$ -L-fucosidase. *Glycobiology* **28**, 860–875, <https://doi.org/10.1093/glycob/cwy079>
- 119 Rodríguez-Díaz, J., Monedero, V. and Yebra, M.J. (2011) Utilization of natural fucosylated oligosaccharides by three novel  $\alpha$ -L-fucosidases from a probiotic *Lactobacillus casei* strain. *Appl. Environ. Microbiol.* **77**, 703–705, <https://doi.org/10.1128/AEM.01906-10>
- 120 Benešová, E., Lipovová, P., Dvořáková, H. and Králová, B. (2013)  $\alpha$ -L-fucosidase from *Paenibacillus thiaminolyticus*: Its hydrolytic and transglucosylation abilities. *Glycobiology* **23**, 1052–1065, <https://doi.org/10.1093/glycob/cwt041>
- 121 Zeuner, B., Vuillemin, M., Holck, J., Muschiol, J. and Meyer, A.S. (2018) Loop engineering of an  $\alpha$ -1,3/4-L-fucosidase for improved synthesis of human milk oligosaccharides. *Enzyme Microb. Technol.* **115**, 37–44, <https://doi.org/10.1016/j.enzmictec.2018.04.008>
- 122 Zhou, W., Jiang, H., Liang, X., Qiu, Y., Wang, L. and Mao, X. (2021) Discovery and characterization of a novel  $\alpha$ -L-fucosidase from the marine-derived *Flavobacterium algicola* and its application in 2'-fucosyllactose production. *Food Chem.* **369**, 130942, <https://doi.org/10.1016/j.foodchem.2021.130942>
- 123 Pozzo, T., Higdon, S.M., Pattathil, S., Hahn, M.G. and Bennett, A.B. (2018) Characterization of novel glycosyl hydrolases discovered by cell wall glycan directed monoclonal antibody screening and metagenome analysis of maize aerial root mucilage. *PLoS ONE* **13**, 1–19, <https://doi.org/10.1371/journal.pone.0204525>
- 124 Thøgersen, M.S., Christensen, S.J., Jepsen, M., Pedersen, L.H. and Stougaard, P. (2020) Transglucosylating  $\beta$ -D-galactosidase and  $\alpha$ -L-fucosidase from *Paenibacillus* sp. 3179 from a hot spring in East Greenland. *Microbiologyopen* **9**, 1–15, <https://doi.org/10.1002/mbo3.980>
